# Supplementary material for: Influences of pH and Iron Concentration on the Salivary Microbiome in Individual Humans with and without Caries
Source: PubMed Central journal article supplement (PMC5288818; doi:10.1128/aem.02412-16), 2017-02-01
Supplement: AEM.02412-16_zam999117663s1.pdf [file AEM.02412-16_zam999117663s1.pdf]

**Influences of pH and iron on the salivary microbiome in individuals with and without caries**

**Running title: Influences of pH and Fe on microbes in caries**

Jianye Zhou<sup>a\*</sup>, Nan Jiang<sup>b\*</sup>, Zhengzheng Wang<sup>c</sup>, Longqing Li<sup>d</sup>, Jumei Zhang<sup>a</sup>, Rui Ma<sup>c</sup>, Hongbing Nie<sup>a</sup>, Zhiqiang Li<sup>a#</sup>.

Key Laboratory of Oral Diseases of Gansu Province, Key Laboratory of Stomatology of State Ethnic Affairs Commission, Northwest University for Nationalities, Lanzhou 730030, Gansu, China<sup>a</sup>; Institute of Applied Ecology, Chinese Academy of Sciences, Shenyang, China<sup>b</sup>; School of Stomatology, Lanzhou University, Lanzhou, China<sup>c</sup>; Institute of Modern Physics, Chinese Academy of Sciences, Lanzhou, China<sup>d</sup>

# Address correspondence to Zhiqiang Li,

Tel.: +86 13519607866

E-mail: sciuse1@163.com

\* Jianye Zhou and Nan Jiang contributed equally to this paper.



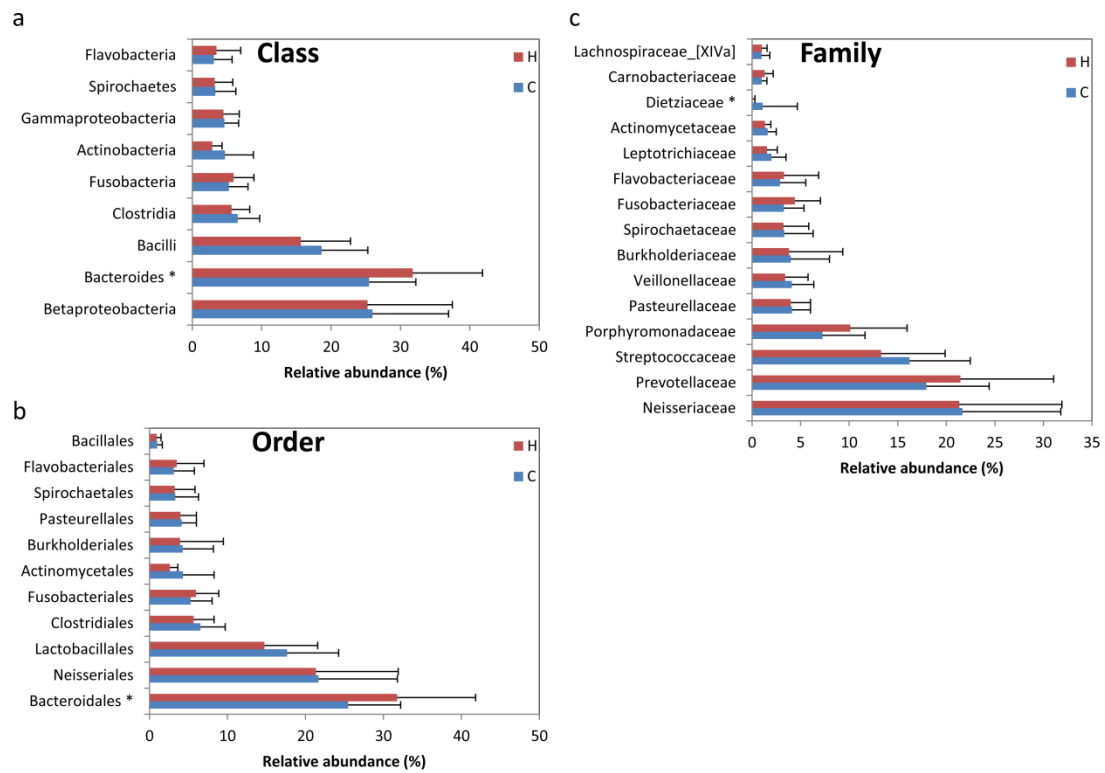

**Fig. S2** Comparisons of bacterial taxonomy (>1% of relative abundance) of samples from individuals with (C) and without (H) carries at the class (a), order (b), and family (c) levels. \*  $P < 0.05$ .

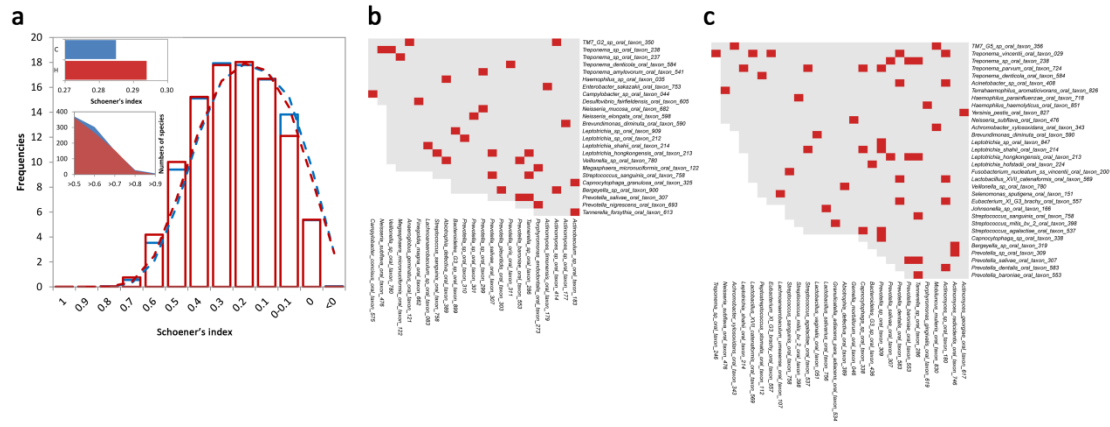

**Fig. S3** Distribution patterns at the species level. (a) The frequency for each interval of Schoener's index was calculated in the caries and healthy groups, respectively. The numbers of involved genera at different intervals and global comparison of schoener's index between the two groups (by T-test) were also showed within the plot. All pairs with higher schoener's index ( $>0.8$ ) were showed in the healthy (b) and caries (c) groups.

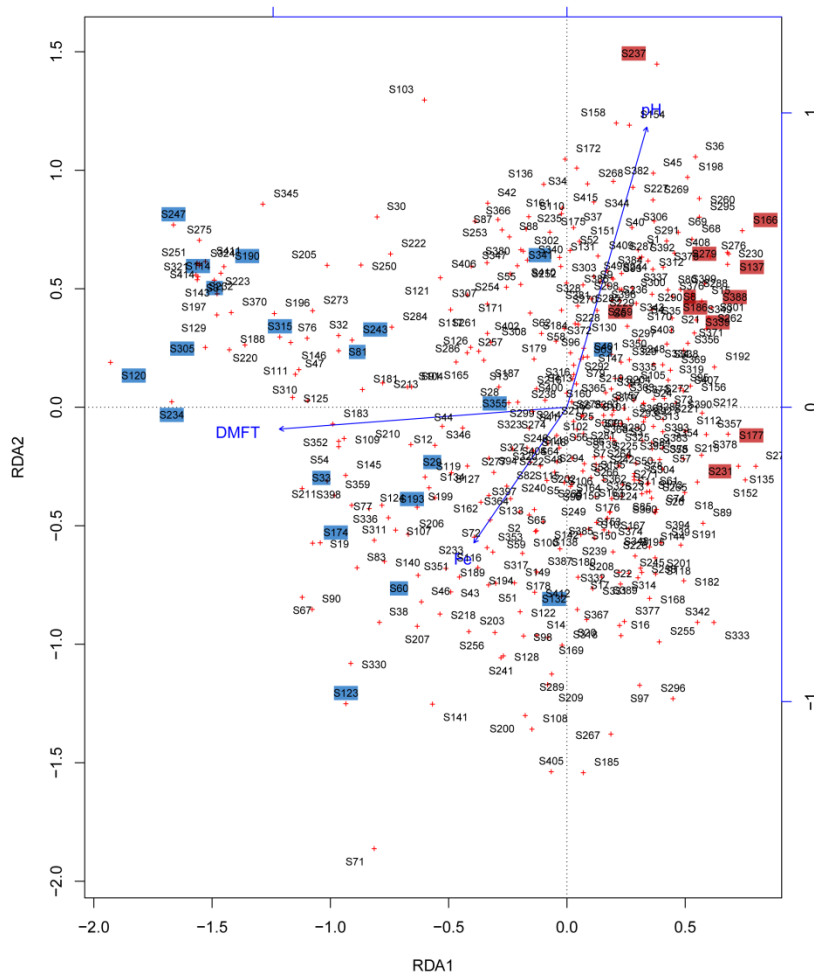

**Fig. S4** Redundancy analysis (RDA) of the significant influences of the salivary pH, iron concentration, and DMFT index on the bacterial community structure at the species level. Red and blue indicate the health- and caries-associated taxa, respectively. The taxonomic information is detailed in Table S3.

Table S1 Characteristics of individuals in the study

| Group      | Age      | N (Female) | DMFT       |
|------------|----------|------------|------------|
| Caries (C) | 40.4±6.5 | 7 (33.3%)  | 4.1±3.4*** |
| Health (H) | 38.7±9.0 | 12 (54.5%) | 0          |

\*\*\* indicates that difference is significant at the 0.001 level.

Table S2 Summary of studies on bacterial community from samples with and without caries

| Reference | Method                    | Sequences <sup>#</sup> | Age (yrs) | Scale (H:C) | Sample                                  | Area            | alpha-diversity | Caries-associated Genera                                                                                                                                                                                                        | Health-associated Genera | Caries-associated Species                                                                                                                                                                                        | Health-associated Species                                                                                                                                                                                                                                                                                                |
|-----------|---------------------------|------------------------|-----------|-------------|-----------------------------------------|-----------------|-----------------|---------------------------------------------------------------------------------------------------------------------------------------------------------------------------------------------------------------------------------|--------------------------|------------------------------------------------------------------------------------------------------------------------------------------------------------------------------------------------------------------|--------------------------------------------------------------------------------------------------------------------------------------------------------------------------------------------------------------------------------------------------------------------------------------------------------------------------|
| here      | Miseq, V4-V5              | 13,749 rps             | 24-55     | 22:21       | Saliva                                  | Gansu, China    | NS              | In test, Figs. 1b and 2a                                                                                                                                                                                                        | In test, Figs. 1b and 2a | In test, Figs. 1c and 2b                                                                                                                                                                                         | In test, Figs. 1c and 2b                                                                                                                                                                                                                                                                                                 |
| (1)       | Miseq, V4                 | 12,638 rps             | 25-55     | 10:10       | Saliva                                  | Gansu, China    | NS              | <i>Veillonella</i><br><i>Bifidobacterium</i><br><i>Parascardovia</i><br><i>Chryseobacterium</i><br><i>Terrimonas</i><br><i>Burkholderia</i><br><i>Sporobacter</i><br><i>Selenomonas</i><br><i>Olsenella</i><br><i>Scardovia</i> | <i>Neisseria</i>         | NR                                                                                                                                                                                                               | NR                                                                                                                                                                                                                                                                                                                       |
| (2)       | 454-pyrosequencing, V3-V4 | 4900 rps               | 3         | 11:11       | mucosa-adherent biofilm & dental plaque | Northern Sweden | H>C             | NS                                                                                                                                                                                                                              |                          | <i>Actinobaculum sp. HOT 183</i><br><i>Atopobium parvulum</i><br><i>Aggregatibacter sp. HOT 513</i><br><i>Streptococcus sp. HOT 431</i><br><i>Streptococcus oralis</i><br><i>S.mitis/Smitis bv2/ S. infantis</i> | <i>Actinomyces sp. HOT 177</i><br><i>Bergeyella sp. HOT 322</i><br><i>Campylobacter concisus</i><br><i>Granulicatella adiacens</i><br><i>Kingella</i> genus<br><i>Kingella dentifricans</i><br><i>Kingella oralis</i><br><i>Leptotrichia hofstadii</i><br><i>Leptotrichia sp. HOT 223 or 234</i><br><i>Streptococcus</i> |

|     |                           |          |             |       |                                  |                 |     |                                 |                            |                                              |                                             |
|-----|---------------------------|----------|-------------|-------|----------------------------------|-----------------|-----|---------------------------------|----------------------------|----------------------------------------------|---------------------------------------------|
|     |                           |          |             |       |                                  |                 |     |                                 |                            |                                              | <i>anginosus/S. gordonii</i>                |
|     |                           |          |             |       |                                  |                 |     |                                 |                            |                                              | <i>Streptococcus sanguinis</i>              |
| (3) | 454-pyrosequencing, V3-V5 | 2724 rps | 68.6-82.2   | 21:21 | Supra-Gingival plaque            | Wuhan, China    | NS  | <i>Atopobium</i>                | <i>Aggregatibacter</i>     | <b><i>Olsenella profusa</i></b>              | <i>Bergeyella sp.</i>                       |
|     |                           |          |             |       |                                  |                 |     | <i>Megasphaera</i>              | <i>BacteroidetesG2</i>     | <b><i>Oribacterium sp.</i></b>               | <i>Catonella morbi</i>                      |
|     |                           |          |             |       |                                  |                 |     | <i>Prevotella</i>               | <i>Tannerella</i>          | <b><i>Propionibacterium acidifaciens</i></b> | <b><i>Alloprevotella sp.</i></b>            |
|     |                           |          |             |       |                                  |                 |     | <i>Veillonella</i>              | <i>Fusobacterium</i>       | <i>Streptococcus mutans</i>                  | <i>Bacteroidetes[G-2] sp.</i>               |
|     |                           |          |             |       |                                  |                 |     | <i>Streptococcus</i>            | <i>Porphyromonas</i>       | <i>Prevotella multisaccharivorax</i>         | <b><i>Propionibacterium propionicum</i></b> |
|     |                           |          |             |       |                                  |                 |     | <i>Actinomyces</i>              | <i>Corynebacterium</i>     | <b><i>Lactobacillus crispatus</i></b>        | <i>Lachnoanaerobaculum umeaense</i>         |
|     |                           |          |             |       |                                  |                 |     | <i>Anaeroglobus</i>             | <i>Delftia</i>             | <i>Prevotella oralis</i>                     | <i>Lachnoanaerobaculum sp.</i>              |
|     |                           |          |             |       |                                  |                 |     | <b><i>Oribacterium</i></b>      | <i>Capnocytophaga</i>      |                                              | <i>Cardiobacterium valvarum</i>             |
|     |                           |          |             |       |                                  |                 |     | <b><i>Pseudoramibacter</i></b>  | <i>Cardiobacterium</i>     |                                              | <i>Prevotella saccharolytica</i>            |
|     |                           |          |             |       |                                  |                 |     | <b><i>Lactobacillus</i></b>     | <i>Catonella</i>           |                                              | <i>Gemella sanguinis</i>                    |
|     |                           |          |             |       |                                  |                 |     | <b><i>Propionibacterium</i></b> | <i>BacteroidetesG5</i>     |                                              | <i>Fretibacterium sp.</i>                   |
|     |                           |          |             |       |                                  |                 |     | <b><i>Olsenella</i></b>         | <i>Gemella</i>             |                                              | <i>Tannerella sp.</i>                       |
|     |                           |          |             |       |                                  |                 |     |                                 | <i>LachnospiraceaeG3</i>   |                                              | <i>Delftia acidovorans</i>                  |
|     |                           |          |             |       |                                  |                 |     |                                 | <i>ClostridialesF2G1</i>   |                                              | <i>Prevotella intermedia</i>                |
|     |                           |          |             |       |                                  |                 |     |                                 | <i>Bergeyella</i>          |                                              | <i>Peptococcus sp.</i>                      |
|     |                           |          |             |       |                                  |                 |     |                                 | <i>Lachnoanaerobaculum</i> |                                              | <i>Bacteroidetes[G-5] sp.</i>               |
| (4) | 454-pyrosequencing, V1-V3 | 4217 rps | 13-24.5 ms* | 9:10  | dental plaque from intact enamel | Beijing, China  | NS  | NS                              | <i>Fusobacterium</i>       | <i>Streptococcus mutans</i>                  |                                             |
|     |                           |          |             |       |                                  |                 |     |                                 | <i>Capnocytophaga</i>      |                                              |                                             |
| (5) | 454-pyrosequencing, V1-V3 | 4805 rps | 3-7         | 30:30 | Supragingival plaques            | Zhejiang, China | H>C | <i>Crptobacterium</i>           | <i>Capnocytophaga</i>      | NR                                           | NR                                          |



|     |                    |         |          |         |                      |                  |     |                     | <i>Lactobacillus</i>   | <i>Fusobacterium</i>      |                                                                                                                               |                                     |
|-----|--------------------|---------|----------|---------|----------------------|------------------|-----|---------------------|------------------------|---------------------------|-------------------------------------------------------------------------------------------------------------------------------|-------------------------------------|
|     |                    |         |          |         |                      |                  |     |                     | <i>Megasphaera</i>     | <i>Porphyromonas</i>      |                                                                                                                               |                                     |
|     |                    |         |          |         |                      |                  |     |                     | <i>Olsenella</i>       | <i>Abiotrophia</i>        |                                                                                                                               |                                     |
|     |                    |         |          |         |                      |                  |     |                     | <i>Scardovia</i>       | <i>Comamonas</i>          |                                                                                                                               |                                     |
|     |                    |         |          |         |                      |                  |     |                     | <i>Shuttleworthia</i>  | <i>Tennerella</i>         |                                                                                                                               |                                     |
|     |                    |         |          |         |                      |                  |     |                     | <i>Cryptobacterium</i> | <i>Eikenella</i>          |                                                                                                                               |                                     |
|     |                    |         |          |         |                      |                  |     |                     | <i>Streptococcus</i>   | <i>Paludibacter</i>       |                                                                                                                               |                                     |
|     |                    |         |          |         |                      |                  |     |                     | <i>Actinomyces</i>     | <i>Treponema</i>          |                                                                                                                               |                                     |
|     |                    |         |          |         |                      |                  |     |                     | <i>Corynebacterium</i> | <i>Actinobaculum</i>      |                                                                                                                               |                                     |
|     |                    |         |          |         |                      |                  |     |                     | <i>Flavobacterium</i>  | <i>Stenotrophomonas</i>   |                                                                                                                               |                                     |
|     |                    |         |          |         |                      |                  |     |                     | <i>Neisseria</i>       | <i>Aestuariimicrobium</i> |                                                                                                                               |                                     |
|     |                    |         |          |         |                      |                  |     |                     | <i>Bergeyella</i>      | <i>Peptococcus</i>        |                                                                                                                               |                                     |
|     |                    |         |          |         |                      |                  |     |                     | <i>Deroxia</i>         |                           |                                                                                                                               |                                     |
| (6) | HOMIM              | NR      | 47-56    | 174-447 | Saliva               | Eriksen et al    | NR  | NR                  | NR                     | NR                        | <i>Streptococcus salivarius</i>                                                                                               | NR                                  |
|     |                    |         |          |         |                      |                  |     |                     |                        |                           | <i>Solobacterium moorei</i>                                                                                                   |                                     |
|     |                    |         |          |         |                      |                  |     |                     |                        |                           | <i>Streptococcus parasanguinis I and II and sp. clone BE024</i> ,<br><i>ot057/411/721</i>                                     |                                     |
|     |                    |         |          |         |                      |                  |     |                     |                        |                           | <i>Streptococcus parasanguinis I and II and sinensis ot411/721/767,</i><br><i>S. salivarius and sp. clone FO042 ot067/755</i> |                                     |
| (7) | DGGE, V3-V5        | 189 cia | 8-32 ms* | 12:12   | Supragingival plaque | Guangzhou, Chian | H>C | NS                  |                        |                           |                                                                                                                               |                                     |
| (8) | HOMIM, Full length | NR      | 6-8      | 20:30   | Saliva               | Guizhou, China   | C>H | <i>Leptotrichia</i> | NR                     |                           | <i>Bacteroidetes[G-2] sp _ot274</i>                                                                                           | <i>Gemella haemolysans_ot626</i>    |
|     |                    |         |          |         |                      |                  |     |                     |                        |                           | <i>Capnocytophaga sputigena_ot775</i>                                                                                         | <i>Granulicatella elegans_ot596</i> |

|      |                                           |          |       |       |                                   |                  |    |                   |                            |                                                                                      |                                                             |
|------|-------------------------------------------|----------|-------|-------|-----------------------------------|------------------|----|-------------------|----------------------------|--------------------------------------------------------------------------------------|-------------------------------------------------------------|
|      |                                           |          |       |       |                                   |                  |    |                   |                            | <i>Tannerella</i> sp_0t286                                                           | <i>Streptococcus infantis</i> and sp clone FN042_0t065_638  |
|      |                                           |          |       |       |                                   |                  |    |                   |                            | <i>Campylobacter showae</i> _0t763                                                   | <i>Streptococcus mitis</i> bv2 and sp clone FP064_0t069_398 |
|      |                                           |          |       |       |                                   |                  |    |                   |                            | <i>Campylobacter</i> Cluster L_0t580_748_763                                         | <i>Streptococcus</i> sp clone F0042_0t067                   |
|      |                                           |          |       |       |                                   |                  |    |                   |                            | <b><i>Selenomonas infelix</i> _0t126 and related species 0t479_0t481_0t639_0t054</b> | <i>Rothia dentocariosa</i> _0t587                           |
|      |                                           |          |       |       |                                   |                  |    |                   |                            | <i>Parvimonas micra</i> _0t111                                                       |                                                             |
|      |                                           |          |       |       |                                   |                  |    |                   |                            | <i>Leptotrichia hofstadii</i> _0t224                                                 |                                                             |
| (9)  | 454-pyrosequencing, V4-V5                 | 9458 rps | 18-22 | 26:19 | Saliva                            | Guangzhou, China | NS | <i>Prevotella</i> | <b><i>Oribacterium</i></b> | <i>Prevotella histicola</i>                                                          | <i>Prevotella</i> sp.                                       |
|      |                                           |          |       |       |                                   |                  |    |                   | <i>Porphyromonas</i>       |                                                                                      |                                                             |
| (10) | Cultivable Bacterial-PCR-Sanger, V3 or V4 | 5608 cia | 2-6   | 40:42 | buccal and interproximal surfaces | Cambridge, USA   | NR | NR                | NR                         | <i>Veillonella parvula</i> HOT 161                                                   | <i>Leptotrichia hofstadii</i> HOT 224                       |
|      |                                           |          |       |       |                                   |                  |    |                   |                            | <i>Actinomyces gerencseriae</i> HOT 618                                              | <b><i>Selenomonas diana</i> HOT 139</b>                     |
|      |                                           |          |       |       |                                   |                  |    |                   |                            | <i>Streptococcus mutans</i> HOT 686                                                  | <i>Capnocytophaga granulosa</i> HOT 325                     |
|      |                                           |          |       |       |                                   |                  |    |                   |                            | <b><i>Scardovia wiggisia</i> HOT 195</b>                                             | <i>Leptotrichia</i> sp. HOT 071                             |
|      |                                           |          |       |       |                                   |                  |    |                   |                            | <i>Porphyromonas catoniae</i> HOT 283                                                | <i>Streptococcus constellatus</i> HOT 758                   |
|      |                                           |          |       |       |                                   |                  |    |                   |                            | <i>Parascardovia denticolens</i> HOT 586                                             | <i>Actinomyces</i> sp. HOT 175                              |
|      |                                           |          |       |       |                                   |                  |    |                   |                            | <i>Streptococcus sobrinus</i> HOT 768                                                | <i>Actinomyces</i> sp. HOT 169                              |
|      |                                           |          |       |       |                                   |                  |    |                   |                            | <i>Eubacterium saburreum</i> (14)(G1)HOT 494                                         | <i>Leptotrichia wadei</i> HOT 222                           |
|      |                                           |          |       |       |                                   |                  |    |                   |                            | <i>Actinomyces</i> sp. HOT 177                                                       | <b><i>Actinomyces</i> sp. HOT 180</b>                       |
|      |                                           |          |       |       |                                   |                  |    |                   |                            | <i>Streptococcus gordonii</i> HOT 622                                                |                                                             |

|      |                               |          |         |       |                                                         |                 |     |                                                                       |                                                                                                                         |                                                                                                                                      |                                                                                                                                                                                                                                                                                                                                                                                  |
|------|-------------------------------|----------|---------|-------|---------------------------------------------------------|-----------------|-----|-----------------------------------------------------------------------|-------------------------------------------------------------------------------------------------------------------------|--------------------------------------------------------------------------------------------------------------------------------------|----------------------------------------------------------------------------------------------------------------------------------------------------------------------------------------------------------------------------------------------------------------------------------------------------------------------------------------------------------------------------------|
|      |                               |          |         |       |                                                         |                 |     |                                                                       |                                                                                                                         |                                                                                                                                      | <i>Streptococcus mitis</i> HOT 677<br><i>Veillonella dispar</i> HOT 160<br><i>Streptococcus intermedius</i> HOT 644<br><i>Streptococcus thermophilus</i> HOT C65<br><i>Streptococcus pneumoniae</i> - <i>Streptococcus infantis</i><br><i>Streptococcus gordonii</i><br><i>Corynebacterium matruchotii</i><br><i>Streptococcus cristatus</i><br><i>Capnocytophaga gingivalis</i> |
| (11) | Sanger sequencing, V5-V9      | 5299 cia | 7-16    | 18:20 | dental plaque                                           | Columbus, USA   | H>C | <b><i>Lactobacillus</i></b><br><br><b><i>Propionibacterium</i></b>    | <i>Streptococcus</i><br><br><i>Corynebacterium</i><br><i>Lachnospiraceae</i><br><i>Gemella</i><br><i>Capnocytophaga</i> | <i>Propionibacterium FMA5</i>                                                                                                        |                                                                                                                                                                                                                                                                                                                                                                                  |
| (12) | Sanger, V1-V3                 | 3802 cia | 2-6     | 41:39 | plaque from cavities                                    | Boston, USA     | NR  | NS                                                                    | NS                                                                                                                      | <i>Granulicatella elegans</i><br><br><i>Veillonella sp. HOT-780</i><br><i>Streptococcus mutans</i><br><i>Bifidobacteriaceae spp.</i> | <i>Capnocytophaga gingivalis</i><br><br><i>Abiotrophia defectiva</i><br><i>Lachnospiraceae sp. HOT-100</i><br><i>Streptococcus sanguinis</i><br><i>Streptococcus cristatus</i>                                                                                                                                                                                                   |
| (13) | DGGE & 454-pyrosequencing, V3 | 1557 rps | 3-6     | 28:32 | saliva and plaque                                       | Hangzhou, China | NS  | <i>Veillonella</i><br><br><i>Actinomyces</i><br><i>Leptotrichia</i>   | <i>Streptococcus</i><br><br><i>Granulicatella</i><br><i>Thiomonas</i>                                                   | NS                                                                                                                                   | NS                                                                                                                                                                                                                                                                                                                                                                               |
| (14) | DGGE, V4                      | 396 cia  | 2.4-8.6 | 8:12  | buccogingival surfaces and accessible proximal surfaces | New York, USA   | H>C | <i>Bacteroidetes</i><br><br><i>Fusobacterium</i><br><i>Filifactor</i> | <i>Leptotrichia</i><br><br><i>Neisseria</i><br><i>Streptococcus</i>                                                     | NR                                                                                                                                   | NR                                                                                                                                                                                                                                                                                                                                                                               |

---

|      |                                          |        |       |      |        |                 |     |                        |    |                             |    |
|------|------------------------------------------|--------|-------|------|--------|-----------------|-----|------------------------|----|-----------------------------|----|
|      |                                          |        |       |      |        |                 |     | <i>Leptotrichia</i>    |    |                             |    |
|      |                                          |        |       |      |        |                 |     | <i>Corynebacterium</i> |    |                             |    |
|      |                                          |        |       |      |        |                 |     | <i>Prevotella</i>      |    |                             |    |
|      |                                          |        |       |      |        |                 |     | <i>Lautropia</i>       |    |                             |    |
|      |                                          |        |       |      |        |                 |     | <i>Treponema</i>       |    |                             |    |
| (15) | Cultivable<br>Bacterial-PC<br>R-DGGE, V4 | 86 cia | 18-22 | 9:11 | Saliva | Birmingham, USA | H>C | NR                     | NR | <i>Streptococcus mutans</i> | NR |

---

# rps and cia indicate reads per sample and clones in all, respectively. \* ms indicates months. NR and NS indicate not-reported and not-significantly, respectively. Bold word represents the taxa that were the same with our study.

**Table S3 Taxonomic assignment of abbreviations in Fig. S4**

| No  | Phylum             | Class                   | Order           | Family                 | Genera                | Species                                         | No   | Phylum         | Class                   | Order             | Family                     | Genera                                  | Species                                       |
|-----|--------------------|-------------------------|-----------------|------------------------|-----------------------|-------------------------------------------------|------|----------------|-------------------------|-------------------|----------------------------|-----------------------------------------|-----------------------------------------------|
| S1  | Proteobacteri<br>a | Betaproteobacteria      | Neisseriales    | Neisseriaceae          | <i>Neisseria</i>      | <i>subflava oral</i><br><i>taxon 476</i>        | S209 | Firmicutes     | Clostridia              | Clostridiales     | Lachnospiraceae_<br>[XIVa] | <i>Lachnospiraceae_</i><br><i>[G-5]</i> | <i>sp. oral taxon 080</i>                     |
| S2  | Firmicutes         | Bacilli                 | Lactobacillales | Streptococcaceae       | <i>Streptococcus</i>  | <i>mitis bv 2 oral</i><br><i>taxon 398</i>      | S210 | Proteobacteria | Betaproteobacteri<br>a  | Neisseriales      | Neisseriaceae              | <i>Kingella</i>                         | <i>denitrificans oral</i><br><i>taxon 582</i> |
| S3  | Bacteroidetes      | Bacteroides             | Bacteroidales   | Prevotellaceae         | <i>Prevotella</i>     | <i>melaninogenica</i><br><i>oral taxon 469</i>  | S211 | TM7            | TM7_[C-1]               | TM7_[O-1]         | TM7_[F-1]                  | <i>TM7_[G-3]</i>                        | <i>sp. oral taxon 351</i>                     |
| S4  | Bacteroidetes      | Bacteroides             | Bacteroidales   | Porphyromonadac<br>eae | <i>Porphyromonas</i>  | <i>sp. oral taxon 279</i>                       | S212 | Proteobacteria | Gammaproteobact<br>eria | Cardiobacteriales | Cardiobacteriaceae         | <i>Cardiobacterium</i>                  | <i>valvulum oral</i><br><i>taxon 540</i>      |
| S5  | Bacteroidetes      | Bacteroides             | Bacteroidales   | Prevotellaceae         | <i>Prevotella</i>     | <i>intermedia oral</i><br><i>taxon 643</i>      | S213 | Spirochaetes   | Spirochaetes            | Spirochaetales    | Spirochaetaceae            | <i>Treponema</i>                        | <i>sp. oral taxon 508</i>                     |
| S6  | Bacteroidetes      | Bacteroides             | Bacteroidales   | Porphyromonadac<br>eae | <i>Porphyromonas</i>  | <i>gingivalis oral</i><br><i>taxon 619</i>      | S214 | Bacteroidetes  | Bacteroides             | Bacteroidales     | Prevotellaceae             | <i>Prevotella</i>                       | <i>sp. oral taxon 305</i>                     |
| S7  | Proteobacteri<br>a | Betaproteobacteria      | Burkholderiales | Burkholderiaceae       | <i>Lautropia</i>      | <i>mirabilis oral</i><br><i>taxon 022</i>       | S215 | Fusobacteria   | Fusobacteria            | Fusobacteriales   | Leptotrichiaceae           | <i>Leptotrichia</i>                     | <i>sp. oral taxon 225</i>                     |
| S8  | Fusobacteria       | Fusobacteria            | Fusobacteriales | Fusobacteriaceae       | <i>Fusobacterium</i>  | <i>periodonticum</i><br><i>oral taxon 201</i>   | S216 | Proteobacteria | Betaproteobacteri<br>a  | Neisseriales      | Neisseriaceae              | <i>Neisseria</i>                        | <i>sp. oral taxon 499</i>                     |
| S9  | Proteobacteri<br>a | Gammaproteobacte<br>ria | Pasteurellales  | Pasteurellaceae        | <i>Terraemophilus</i> | <i>aromaticivorans</i><br><i>oral taxon 826</i> | S217 | Firmicutes     | Clostridia              | Clostridiales     | Veillonellaceae            | <i>Anaeroglobus</i>                     | <i>geminatus oral</i><br><i>taxon 121</i>     |
| S10 | Firmicutes         | Clostridia              | Clostridiales   | Veillonellaceae        | <i>Veillonella</i>    | <i>parvula oral</i><br><i>taxon 161</i>         | S218 | Firmicutes     | Clostridia              | Clostridiales     | Lachnospiraceae_<br>[XIVa] | <i>Moryella</i>                         | <i>sp. oral taxon 419</i>                     |
| S11 | Bacteroidetes      | Bacteroides             | Bacteroidales   | Prevotellaceae         | <i>Alloprevotella</i> | <i>sp. oral taxon 473</i>                       | S219 | Firmicutes     | Clostridia              | Clostridiales     | Lachnospiraceae_<br>[XIVa] | <i>Lachnospiraceae_</i><br><i>[G-2]</i> | <i>sp. oral taxon 096</i>                     |
| S12 | Proteobacteri<br>a | Betaproteobacteria      | Neisseriales    | Neisseriaceae          | <i>Neisseria</i>      | <i>oralis oral taxon</i><br><i>014</i>          | S220 | Proteobacteria | Alphaproteobacter<br>ia | Caulobacterales   | Caulobacteraceae           | <i>Caulobacter</i>                      | <i>sp. oral taxon 002</i>                     |

|     |                |                     |                  |                    |                        |                                                 |      |                |                    |                 |                            |                                        |                                    |
|-----|----------------|---------------------|------------------|--------------------|------------------------|-------------------------------------------------|------|----------------|--------------------|-----------------|----------------------------|----------------------------------------|------------------------------------|
| S13 | Proteobacteria | Betaproteobacteria  | Neisseriales     | Neisseriaceae      | <i>Neisseria</i>       | <i>mucosa oral</i><br><i>taxon 682</i>          | S221 | Firmicutes     | Clostridia         | Clostridiales   | Veillonellaceae            | <i>Veillonellaceae_[G-1]</i>           | <i>sp. oral taxon 145</i>          |
| S14 | Bacteroidetes  | Bacteroides         | Bacteroidales    | Porphyromonadaceae | <i>Porphyromonas</i>   | <i>endodontalis oral</i><br><i>taxon 273</i>    | S222 | Firmicutes     | Clostridia         | Clostridiales   | Veillonellaceae            | <i>Selenomonas</i>                     | <i>noxia oral taxon 130</i>        |
| S15 | Bacteroidetes  | Flavobacteria       | Flavobacteriales | Flavobacteriaceae  | <i>Capnocytophaga</i>  | <i>leadbetteri oral</i><br><i>taxon 329</i>     | S223 | Firmicutes     | Clostridia         | Clostridiales   | Peptostreptococcaeae_[XI]  | <i>Eubacterium_[XI][G-3]</i>           | <i>brachy oral taxon 557</i>       |
| S16 | Firmicutes     | Bacilli             | Lactobacillales  | Streptococcaceae   | <i>Streptococcus</i>   | <i>salivarius oral</i><br><i>taxon 755</i>      | S224 | Proteobacteria | Betaproteobacteria | Neisseriales    | Neisseriaceae              | <i>Simonsiella</i>                     | <i>muelleri oral taxon 683</i>     |
| S17 | Proteobacteria | Gammaproteobacteria | Pasteurellales   | Pasteurellaceae    | <i>Aggregatibacter</i> | <i>segnis oral taxon 762</i>                    | S225 | Bacteroidetes  | Bacteroides        | Bacteroidales   | Prevotellaceae             | <i>Prevotella</i>                      | <i>scopos oral taxon 885</i>       |
| S18 | Firmicutes     | Bacilli             | Lactobacillales  | Carnobacteriaceae  | <i>Granulicatella</i>  | <i>[para-adiacens]</i><br><i>oral taxon 534</i> | S226 | Proteobacteria | Betaproteobacteria | Burkholderiales | Comomonadaceae             | <i>Variovorax</i>                      | <i>paradoxus oral taxon 717</i>    |
| S19 | Bacteroidetes  | Bacteroides         | Bacteroidales    | Prevotellaceae     | <i>Alloprevotella</i>  | <i>tammerae oral</i><br><i>taxon 466</i>        | S227 | Bacteroidetes  | Bacteroides        | Bacteroidales   | Prevotellaceae             | <i>Prevotella</i>                      | <i>oralis oral taxon 705</i>       |
| S20 | Actinobacteria | Actinobacteria      | Actinomycetales  | Micrococcaceae     | <i>Rothia</i>          | <i>aeria oral taxon 188</i>                     | S228 | Firmicutes     | Bacilli            | Lactobacillales | Lactobacillaceae           | <i>Lactobacillus</i>                   | <i>rhammosus oral taxon 749</i>    |
| S21 | Bacteroidetes  | Bacteroides         | Bacteroidales    | Prevotellaceae     | <i>Prevotella</i>      | <i>sp. oral taxon 304</i>                       | S229 | Firmicutes     | Clostridia         | Clostridiales   | Syntrophomonadaceae_[VIII] | <i>Syntrophomonadaceae_[VIII][G-1]</i> | <i>sp. oral taxon 435</i>          |
| S22 | Proteobacteria | Betaproteobacteria  | Neisseriales     | Neisseriaceae      | <i>Neisseria</i>       | <i>elongata oral</i><br><i>taxon 598</i>        | S230 | Fusobacteria   | Fusobacteria       | Fusobacteriales | Leptotrichiaceae           | <i>Leptotrichia</i>                    | <i>sp. oral taxon 219</i>          |
| S23 | Firmicutes     | Bacilli             | Lactobacillales  | Streptococcaceae   | <i>Streptococcus</i>   | <i>sp. oral taxon 067</i>                       | S231 | Actinobacteria | Actinobacteria     | Actinomycetales | Actinomycetaceae           | <i>Actinobaculum</i>                   | <i>sp. oral taxon 183</i>          |
| S24 | Firmicutes     | Bacilli             | Bacillales       | Staphylococcaceae  | <i>Gemella</i>         | <i>morbillorum oral</i><br><i>taxon 046</i>     | S232 | Bacteroidetes  | Bacteroides        | Bacteroidales   | Prevotellaceae             | <i>Prevotella</i>                      | <i>sp. oral taxon 309</i>          |
| S25 | Bacteroidetes  | Bacteroides         | Bacteroidales    | Prevotellaceae     | <i>Prevotella</i>      | <i>oris oral taxon 311</i>                      | S233 | Actinobacteria | Actinobacteria     | Actinomycetales | Propionibacteriaceae       | <i>Propionibacterium</i>               | <i>acidifaciens oral taxon 191</i> |

|     |                |                      |                  |                   |                       |                                      |      |                |                      |                  |                           |                                       |                                       |
|-----|----------------|----------------------|------------------|-------------------|-----------------------|--------------------------------------|------|----------------|----------------------|------------------|---------------------------|---------------------------------------|---------------------------------------|
| S26 | Bacteroidetes  | Flavobacteria        | Flavobacteriales | Flavobacteriaceae | <i>Capnocytophaga</i> | <i>granulosa</i> oral<br>taxon 325   | S234 | Firmicutes     | Clostridia           | Clostridiales    | Veillonellaceae           | <i>Megasphaera</i>                    | <i>sp. oral taxon 123</i>             |
| S27 | Bacteroidetes  | Bacteroides          | Bacteroidales    | Prevotellaceae    | <i>Prevotella</i>     | <i>nigrescens</i> oral<br>taxon 693  | S235 | Proteobacteria | Betaproteobacteria   | Neisseriales     | Neisseriaceae             | <i>Kingella</i>                       | <i>sp. oral taxon 459</i>             |
| S28 | Bacteroidetes  | Bacteroides          | Bacteroidales    | Prevotellaceae    | <i>Alloprevotella</i> | <i>sp. oral taxon 914</i>            | S236 | Spirochaetes   | Spirochaetes         | Spirochaetales   | Spirochaetaceae           | <i>Treponema</i>                      | <i>pallidum</i> oral<br>taxon 805     |
| S29 | Spirochaetes   | Spirochaetes         | Spirochaetales   | Spirochaetaceae   | <i>Treponema</i>      | <i>sp. oral taxon 257</i>            | S237 | Proteobacteria | Betaproteobacteria   | Neisseriales     | Neisseriaceae             | <i>Neisseria</i>                      | <i>lactamica</i> oral<br>taxon 649    |
| S30 | Firmicutes     | Bacilli              | Lactobacillales  | Streptococcaceae  | <i>Streptococcus</i>  | <i>sanguinis</i> oral<br>taxon 758   | S238 | Proteobacteria | Gamma proteobacteria | Pseudomonadales  | Moraxellaceae             | <i>Moraxella</i>                      | <i>osloensis</i> oral<br>taxon 711    |
| S31 | Actinobacteria | Actinobacteria       | Actinomycetales  | Actinomycetaceae  | <i>Actinomyces</i>    | <i>sp. oral taxon 180</i>            | S239 | Spirochaetes   | Spirochaetes         | Spirochaetales   | Spirochaetaceae           | <i>Treponema</i>                      | <i>sp. oral taxon 239</i>             |
| S32 | Proteobacteria | Betaproteobacteria   | Neisseriales     | Neisseriaceae     | <i>Neisseria</i>      | <i>pharyngis</i> oral<br>taxon 729   | S240 | Firmicutes     | Clostridia           | Clostridiales    | Peptostreptococcaeae_[XI] | <i>Peptostreptococcaeae_[XI][G-2]</i> | <i>sp. oral taxon 091</i>             |
| S33 | Spirochaetes   | Spirochaetes         | Spirochaetales   | Spirochaetaceae   | <i>Treponema</i>      | <i>sp. oral taxon 262</i>            | S241 | Fusobacteria   | Fusobacteria         | Fusobacteriales  | Leptotrichiaceae          | <i>Leptotrichia</i>                   | <i>sp. oral taxon 218</i>             |
| S34 | Spirochaetes   | Spirochaetes         | Spirochaetales   | Spirochaetaceae   | <i>Treponema</i>      | <i>sp. oral taxon 238</i>            | S242 | Bacteroidetes  | Flavobacteria        | Flavobacteriales | Flavobacteriaceae         | <i>Capnocytophaga</i>                 | <i>sp. oral taxon 864</i>             |
| S35 | Bacteroidetes  | Bacteroides          | Bacteroidales    | Prevotellaceae    | <i>Prevotella</i>     | <i>sp. oral taxon 317</i>            | S243 | Actinobacteria | Actinobacteria       | Actinomycetales  | Mycobacteriaceae          | <i>Mycobacterium</i>                  | <i>tuberculosis</i> oral<br>taxon 822 |
| S36 | Bacteroidetes  | Bacteroides          | Bacteroidales    | Prevotellaceae    | <i>Prevotella</i>     | <i>denticola</i> oral<br>taxon 291   | S244 | Firmicutes     | Clostridia           | Clostridiales    | Veillonellaceae           | <i>Dialister</i>                      | <i>pneumosintes</i> oral<br>taxon 736 |
| S37 | Proteobacteria | Gamma proteobacteria | Pseudomonadales  | Moraxellaceae     | <i>Moraxella</i>      | <i>catarrhalis</i> oral<br>taxon 833 | S245 | Actinobacteria | Actinobacteria       | Coriobacteriales | Coriobacteriaceae         | <i>Atopobium</i>                      | <i>parvulum</i> oral<br>taxon 723     |
| S38 | Spirochaetes   | Spirochaetes         | Spirochaetales   | Spirochaetaceae   | <i>Treponema</i>      | <i>amylovorum</i> oral<br>taxon 541  | S246 | Actinobacteria | Actinobacteria       | Actinomycetales  | Actinomycetaceae          | <i>Actinomyces</i>                    | <i>massiliensis</i> oral<br>taxon 852 |
| S39 | Firmicutes     | Clostridia           | Clostridiales    | Veillonellaceae   | <i>Selenomonas</i>    | <i>sp. oral taxon 481</i>            | S247 | Fusobacteria   | Fusobacteria         | Fusobacteriales  | Leptotrichiaceae          | <i>Leptotrichia</i>                   | <i>sp. oral taxon 215</i>             |
| S40 | Bacteroidetes  | Flavobacteria        | Flavobacteriales | Flavobacteriaceae | <i>Capnocytophaga</i> | <i>sp. oral taxon 332</i>            | S248 | SR1            | SR1_[C-1]            | SR1_[O-1]        | SR1_[F-1]                 | SR1_[G-1]                             | <i>sp. oral taxon 345</i>             |

|     |                |                       |                     |                     |                       |                                       |      |                |                     |                       |                       |                              |                                              |
|-----|----------------|-----------------------|---------------------|---------------------|-----------------------|---------------------------------------|------|----------------|---------------------|-----------------------|-----------------------|------------------------------|----------------------------------------------|
| S41 | Fusobacteria   | Fusobacteria          | Fusobacteriales     | Leptotrichiaceae    | <i>Leptotrichia</i>   | <i>hofstadii</i> oral<br>taxon 224    | S249 | Spirochaetes   | Spirochaetes        | Spirochaetales        | Spirochaetaceae       | <i>Treponema</i>             | <i>sp. oral</i> taxon 270                    |
| S42 | Bacteroidetes  | Bacteroides           | Bacteroidales       | Porphyromonadaceae  | <i>Tannerella</i>     | <i>sp. oral</i> taxon 286             | S250 | Proteobacteria | Betaproteobacteria  | Burkholderiales       | Comomonadaceae        | <i>Delftia</i>               | <i>acidovorans</i> oral<br>taxon 023         |
| S43 | Bacteroidetes  | Bacteroides           | Bacteroidales       | Prevotellaceae      | <i>Prevotella</i>     | <i>sp. oral</i> taxon 299             | S251 | Firmicutes     | Erysipelotrichi     | Erysipelotrichi_[O-1] | Erysipelotrichi_[F-1] | <i>Lactobacillus</i> _[XVII] | <i>catenaformis</i> oral<br>taxon 569        |
| S44 | Proteobacteria | Betaproteobacteria    | Neisseriales        | Neisseriaceae       | <i>Neisseria</i>      | <i>sp. oral</i> taxon 020             | S252 | Proteobacteria | Betaproteobacteria  | Burkholderiales       | Comamonadaceae        | <i>Comamonas</i>             | <i>testosteroni</i> oral<br>taxon 858        |
| S45 | Bacteroidetes  | Bacteroides           | Bacteroidales       | Prevotellaceae      | <i>Alloprevotella</i> | <i>sp. oral</i> taxon 912             | S253 | Spirochaetes   | Spirochaetes        | Spirochaetales        | Spirochaetaceae       | <i>Treponema</i>             | <i>sp. oral</i> taxon 255                    |
| S46 | Firmicutes     | Bacilli               | Lactobacillales     | Streptococcaceae    | <i>Streptococcus</i>  | <i>constellatus</i> oral<br>taxon 576 | S254 | Fusobacteria   | Fusobacteria        | Fusobacteriales       | Leptotrichiaceae      | <i>Leptotrichia</i>          | <i>goodfellowii</i> oral<br>taxon 845        |
| S47 | Synergistetes  | Synergistetes_[C-1]   | Synergistetes_[O-1] | Synergistetes_[F-2] | <i>Fretibacterium</i> | <i>sp. oral</i> taxon 453             | S255 | Proteobacteria | Alphaproteobacteria | Rhizobiales           | Bradyrhizobiaceae     | <i>Afipia</i>                | <i>sp. genomospecies</i><br>8 oral taxon 636 |
| S48 | Proteobacteria | Epsilonproteobacteria | Campylobacteriales  | Campylobacteraceae  | <i>Campylobacter</i>  | <i>concisus</i> oral<br>taxon 575     | S256 | Bacteroidetes  | Bacteroidetes_[C-1] | Bacteroidetes_[O-1]   | Bacteroidetes_[F-1]   | <i>Bacteroidetes</i> _[G-5]  | <i>sp. oral</i> taxon 511                    |
| S49 | Firmicutes     | Clostridia            | Clostridiales       | Clostridiales_[F-2] | Clostridiales_[F-2]   | <i>sp. oral</i> taxon 075             | S257 | TM7            | TM7_[C-1]           | TM7_[O-1]             | TM7_[F-1]             | <i>TM7</i> _[G-1]            | <i>sp. oral</i> taxon 346                    |
| S50 | Bacteroidetes  | Bacteroides           | Bacteroidales       | Prevotellaceae      | <i>Prevotella</i>     | <i>sp. oral</i> taxon 443             | S258 | Firmicutes     | Bacilli             | Lactobacillales       | Streptococcaceae      | <i>Streptococcus</i>         | <i>peroris</i> oral<br>taxon 728             |
| S51 | Bacteroidetes  | Bacteroides           | Bacteroidales       | Prevotellaceae      | <i>Prevotella</i>     | <i>sp. oral</i> taxon 526             | S259 | Proteobacteria | Betaproteobacteria  | Rhodocyclales         | Rhodocyclaceae        | <i>Rhodocyclus</i>           | <i>sp. oral</i> taxon 028                    |
| S52 | Firmicutes     | Clostridia            | Clostridiales       | Veillonellaceae     | <i>Veillonella</i>    | <i>sp. oral</i> taxon 780             | S260 | Firmicutes     | Bacilli             | Lactobacillales       | Enterococcaceae       | <i>Enterococcus</i>          | <i>italicus</i> oral<br>taxon 803            |
| S53 | Bacteroidetes  | Bacteroides           | Bacteroidales       | Prevotellaceae      | <i>Prevotella</i>     | <i>sp. oral</i> taxon 310             | S261 | Proteobacteria | Betaproteobacteria  | Neisseriales          | Neisseriaceae         | <i>Eikenella</i>             | <i>corrodens</i> oral<br>taxon 577           |
| S54 | Spirochaetes   | Spirochaetes          | Spirochaetales      | Spirochaetaceae     | <i>Treponema</i>      | <i>denticola</i> oral                 | S262 | Firmicutes     | Bacilli             | Bacillales            | Bacillaceae           | <i>Bacillus</i>              | <i>anthracis</i> oral                        |



|     |                |                       |                    |                           |                       |                                 |      |                |                     |                 |                        |                            |                                         |
|-----|----------------|-----------------------|--------------------|---------------------------|-----------------------|---------------------------------|------|----------------|---------------------|-----------------|------------------------|----------------------------|-----------------------------------------|
|     |                |                       |                    |                           |                       | <i>taxon 584</i>                |      |                |                     |                 |                        |                            | <i>taxon 824</i>                        |
|     |                |                       |                    |                           |                       | <i>nucleatum ss</i>             |      |                |                     |                 |                        |                            |                                         |
| S55 | Fusobacteria   | Fusobacteria          | Fusobacteriales    | Fusobacteriaceae          | <i>Fusobacterium</i>  | <i>vincentii oral taxon 200</i> | S263 | Actinobacteria | Actinobacteria      | Actinomycetales | Actinomycetaceae       | <i>Actinomyces</i>         | <i>sp. oral taxon 414</i>               |
| S56 | Actinobacteria | Actinobacteria        | Actinomycetales    | Actinomycetaceae          | <i>Actinomyces</i>    | <i>sp. oral taxon 177</i>       | S264 | Proteobacteria | Gammaproteobacteria | Xanthomonadales | Xanthomonadaceae       | <i>Stenotrophomonas</i>    | <i>malophilus oral taxon 663</i>        |
| S57 | Firmicutes     | Clostridia            | Clostridiales      | Peptostreptococcaeae_[XI] | <i>Filifactor</i>     | <i>alocis oral taxon 539</i>    | S265 | Firmicutes     | Clostridia          | Clostridiales   | Lachnospiraceae_[XIVa] | <i>Lachnoanaerobaculum</i> | <i>sp. oral taxon 083</i>               |
| S58 | Fusobacteria   | Fusobacteria          | Fusobacteriales    | Leptotrichiaceae          | <i>Leptotrichia</i>   | <i>sp. oral taxon 462</i>       | S266 | Spirochaetes   | Spirochaetes        | Spirochaetales  | Spirochaetaceae        | <i>Treponema</i>           | <i>sp. oral taxon 230</i>               |
| S59 | Proteobacteria | Epsilonproteobacteria | Campylobacteriales | Campylobacteraceae        | <i>Campylobacter</i>  | <i>rectus oral taxon 748</i>    | S267 | Actinobacteria | Actinobacteria      | Actinomycetales | Actinomycetaceae       | <i>Actinomyces</i>         | <i>sp. oral taxon 448</i>               |
| S60 | Firmicutes     | Bacilli               | Lactobacillales    | Streptococcaceae          | <i>Streptococcus</i>  | <i>sp. oral taxon 056</i>       | S268 | Firmicutes     | Clostridia          | Clostridiales   | Lachnospiraceae_[XIVa] | <i>Moryella</i>            | <i>sp. oral taxon 373</i>               |
| S61 | Bacteroidetes  | Bacteroides           | Bacteroidales      | Prevotellaceae            | <i>Prevotella</i>     | <i>sp. oral taxon 472</i>       | S269 | Bacteroidetes  | Bacteroides         | Bacteroidales   | Prevotellaceae         | <i>Prevotella</i>          | <i>multisaccharivora oral taxon 794</i> |
| S62 | Fusobacteria   | Fusobacteria          | Fusobacteriales    | Leptotrichiaceae          | <i>Leptotrichia</i>   | <i>sp. oral taxon 212</i>       | S270 | Proteobacteria | Gammaproteobacteria | Pseudomonadales | Moraxellaceae          | <i>Acinetobacter</i>       | <i>baumannii oral taxon 554</i>         |
| S63 | Bacteroidetes  | Flavobacteria         | Flavobacteriales   | Flavobacteriaceae         | <i>Capnocytophaga</i> | <i>sputigena oral taxon 775</i> | S271 | Firmicutes     | Bacilli             | Lactobacillales | Streptococcaceae       | <i>Streptococcus</i>       | <i>sp. oral taxon 074</i>               |
| S64 | Bacteroidetes  | Bacteroides           | Bacteroidales      | Prevotellaceae            | <i>Prevotella</i>     | <i>oulorum oral taxon 288</i>   | S272 | Spirochaetes   | Spirochaetes        | Spirochaetales  | Spirochaetaceae        | <i>Treponema</i>           | <i>sp. oral taxon 254</i>               |
| S65 | Firmicutes     | Clostridia            | Clostridiales      | Lachnospiraceae_[XIVa]    | <i>Oribacterium</i>   | <i>sp. oral taxon 108</i>       | S273 | Proteobacteria | Gammaproteobacteria | Pasteurellales  | Pasteurellaceae        | <i>Aggregatibacter</i>     | <i>aphrophilus oral taxon 545</i>       |
| S66 | Fusobacteria   | Fusobacteria          | Fusobacteriales    | Leptotrichiaceae          | <i>Leptotrichia</i>   | <i>sp. oral taxon 221</i>       | S274 | SR1            | SR1_[C-1]           | SR1_[O-1]       | SR1_[F-1]              | <i>SR1_[G-1]</i>           | <i>sp. oral taxon 875</i>               |
| S67 | Firmicutes     | Bacilli               | Lactobacillales    | Carnobacteriaceae         | <i>Granulicatella</i> | <i>elegans oral taxon 596</i>   | S275 | Proteobacteria | Gammaproteobacteria | Pseudomonadales | Moraxellaceae          | <i>Acinetobacter</i>       | <i>sp. oral taxon 408</i>               |

|     |                |                     |                  |                        |                               |                                       |      |                |                       |                   |                        |                          |                                 |
|-----|----------------|---------------------|------------------|------------------------|-------------------------------|---------------------------------------|------|----------------|-----------------------|-------------------|------------------------|--------------------------|---------------------------------|
| S68 | Bacteroidetes  | Flavobacteria       | Flavobacteriales | Flavobacteriales_[F-1] | <i>Flavobacteriales_[G-1]</i> | <i>sp. oral taxon 318</i>             | S276 | Bacteroidetes  | Bacteroides           | Bacteroidales     | Porphyromonadaceae     | <i>Porphyromonas</i>     | <i>sp. oral taxon 275</i>       |
| S69 | Actinobacteria | Actinobacteria      | Actinomycetales  | Corynebacteriaceae     | <i>Corynebacterium</i>        | <i>matruchotii oral taxon 666</i>     | S277 | Bacteroidetes  | Bacteroides           | Bacteroidales     | Prevotellaceae         | <i>Alloprevotella</i>    | <i>sp. oral taxon 308</i>       |
| S70 | Proteobacteria | Gammaproteobacteria | Pasteurellales   | Pasteurellaceae        | <i>Haemophilus</i>            | <i>haemolyticus oral taxon 851</i>    | S278 | Spirochaetes   | Spirochaetes          | Spirochaetales    | Spirochaetaceae        | <i>Treponema</i>         | <i>sp. oral taxon 490</i>       |
| S71 | Spirochaetes   | Spirochaetes        | Spirochaetales   | Spirochaetaceae        | <i>Treponema</i>              | <i>sp. oral taxon 235</i>             | S279 | Firmicutes     | Bacilli               | Lactobacillales   | Lactobacillaceae       | <i>Lactobacillus</i>     | <i>crispatus oral taxon 817</i> |
| S72 | Firmicutes     | Bacilli             | Lactobacillales  | Streptococcaceae       | <i>Streptococcus</i>          | <i>oligofermentans oral taxon 886</i> | S280 | Proteobacteria | Deltaproteobacteria   | Desulfobacterales | Desulfobulbaceae       | <i>Desulfobulbus</i>     | <i>sp. oral taxon 041</i>       |
| S73 | Actinobacteria | Actinobacteria      | Coriobacteriales | Coriobacteriaceae      | <i>Eggerthella</i>            | <i>lenta oral taxon 654</i>           | S281 | Proteobacteria | Epsilonproteobacteria | Campylobacterales | Helicobacteraceae      | <i>Helicobacter</i>      | <i>pylori oral taxon 812</i>    |
| S74 | Bacteroidetes  | Bacteroides         | Bacteroidales    | Prevotellaceae         | <i>Alloprevotella</i>         | <i>rava oral taxon 302</i>            | S282 | Firmicutes     | Clostridia            | Clostridiales     | Lachnospiraceae_[XIVa] | <i>Oribacterium</i>      | <i>sp. oral taxon 078</i>       |
| S75 | Firmicutes     | Clostridia          | Clostridiales    | Veillonellaceae        | <i>Selenomonas</i>            | <i>sputigena oral taxon 151</i>       | S283 | Proteobacteria | Betaproteobacteria    | Burkholderiales   | Comomonadaceae         | <i>Leptothrix</i>        | <i>sp. oral taxon 025</i>       |
| S76 | Bacteroidetes  | Bacteroides         | Bacteroidales    | Prevotellaceae         | <i>Prevotella</i>             | <i>maculosa oral taxon 289</i>        | S284 | Actinobacteria | Actinobacteria        | Actinomycetales   | Micrococcaceae         | <i>Kocuria</i>           | <i>sp. oral taxon 189</i>       |
| S77 | Firmicutes     | Bacilli             | Lactobacillales  | Streptococcaceae       | <i>Streptococcus</i>          | <i>sp. oral taxon 069</i>             | S285 | Proteobacteria | Betaproteobacteria    | Neisseriales      | Neisseriaceae          | <i>Kingella</i>          | <i>sp. oral taxon 012</i>       |
| S78 | Firmicutes     | Clostridia          | Clostridiales    | Lachnospiraceae_[XIVa] | <i>Catonella</i>              | <i>morbi oral taxon 165</i>           | S286 | Chloroflexi    | Chloroflexi_[C-1]     | Chloroflexi_[O-1] | Chloroflexi_[F-1]      | <i>Chloroflexi_[G-1]</i> | <i>sp. oral taxon 439</i>       |
| S79 | Proteobacteria | Gammaproteobacteria | Pasteurellales   | Pasteurellaceae        | <i>Haemophilus</i>            | <i>sp. oral taxon 035</i>             | S287 | Bacteroidetes  | Bacteroides           | Bacteroidales     | Porphyromonadaceae     | <i>Porphyromonas</i>     | <i>sp. oral taxon 285</i>       |
| S80 | Bacteroidetes  | Bacteroides         | Bacteroidales    | Prevotellaceae         | <i>Prevotella</i>             | <i>pleuritidis oral taxon 303</i>     | S288 | Actinobacteria | Actinobacteria        | Actinomycetales   | Propionibacteriaceae   | <i>Propionibacterium</i> | <i>acnes oral taxon 530</i>     |

|     |                |                |                  |                           |                            |                                               |      |                |                     |                   |                        |                      |                                                  |
|-----|----------------|----------------|------------------|---------------------------|----------------------------|-----------------------------------------------|------|----------------|---------------------|-------------------|------------------------|----------------------|--------------------------------------------------|
|     |                |                |                  |                           |                            | <i>nucleatum</i> ss                           |      |                |                     |                   |                        |                      |                                                  |
| S81 | Fusobacteria   | Fusobacteria   | Fusobacteriales  | Fusobacteriaceae          | <i>Fusobacterium</i>       | <i>animalis</i> oral<br>taxon 420             | S289 | Spirochaetes   | Spirochaetes        | Spirochaetales    | Spirochaetaceae        | <i>Treponema</i>     | <i>sp. oral</i> taxon 236                        |
| S82 | Firmicutes     | Clostridia     | Clostridiales    | Lachnospiraceae_[XIVa]    | <i>Lachnoanaerobaculum</i> | <i>umeaense</i> oral<br>taxon 107             | S290 | Firmicutes     | Bacilli             | Lactobacillales   | Streptococcaceae       | <i>Streptococcus</i> | <i>sp. oral</i> taxon 487                        |
| S83 | Firmicutes     | Clostridia     | Clostridiales    | Peptostreptococcaeae_[XI] | <i>Peptostreptococcus</i>  | <i>stomatis</i> oral<br>taxon 112             | S291 | Actinobacteria | Actinobacteria      | Coriobacteriales  | Coriobacteriaceae      | <i>Olsenella</i>     | <i>sp. oral</i> taxon 807                        |
| S84 | Bacteroidetes  | Bacteroides    | Bacteroidales    | Prevotellaceae            | <i>Prevotella</i>          | <i>pallens</i> oral taxon<br>714              | S292 | Bacteroidetes  | Bacteroides         | Bacteroidales     | Bacteroidaceae         | <i>Bacteroides</i>   | <i>zooglyphiformans</i><br><i>oral</i> taxon 465 |
| S85 | Bacteroidetes  | Bacteroides    | Bacteroidales    | Prevotellaceae            | <i>Prevotella</i>          | <i>sp. oral</i> taxon 396                     | S293 | Actinobacteria | Actinobacteria      | Bifidobacteriales | Bifidobacteriaceae     | <i>Scardovia</i>     | <i>wiggisiae</i> oral<br>taxon 195               |
| S86 | Firmicutes     | Clostridia     | Clostridiales    | Lachnospiraceae_[XIVa]    | <i>Moryella</i>            | <i>sp. oral</i> taxon 097                     | S294 | Firmicutes     | Bacilli             | Lactobacillales   | Streptococcaceae       | <i>Streptococcus</i> | <i>sp. oral</i> taxon 423                        |
| S87 | Fusobacteria   | Fusobacteria   | Fusobacteriales  | Leptotrichiaceae          | <i>Leptotrichia</i>        | <i>hongkongensis</i><br><i>oral</i> taxon 213 | S295 | Actinobacteria | Actinobacteria      | Actinomycetales   | Actinomycetaceae       | <i>Actinomyces</i>   | <i>sp. oral</i> taxon 897                        |
| S88 | Bacteroidetes  | Bacteroides    | Bacteroidales    | Prevotellaceae            | <i>Prevotella</i>          | <i>salivae</i> oral taxon<br>307              | S296 | Proteobacteria | Alphaproteobacteria | Sphingomonadales  | Sphingomonadaceae      | <i>Sphingomonas</i>  | <i>sp. oral</i> taxon 006                        |
| S89 | Fusobacteria   | Fusobacteria   | Fusobacteriales  | Leptotrichiaceae          | <i>Sneathia</i>            | <i>sanguinegens</i><br><i>oral</i> taxon 837  | S297 | Firmicutes     | Clostridia          | Clostridiales     | Veillonellaceae        | <i>Selenomonas</i>   | <i>sp. oral</i> taxon 137                        |
| S90 | Bacteroidetes  | Flavobacteria  | Flavobacteriales | Flavobacteriaceae         | <i>Bergeyella</i>          | <i>sp. oral</i> taxon 322                     | S298 | Firmicutes     | Clostridia          | Clostridiales     | Lachnospiraceae_[XIVa] | <i>Oribacterium</i>  | <i>sp. oral</i> taxon 102                        |
| S91 | Actinobacteria | Actinobacteria | Actinomycetales  | Corynebacteriaceae        | <i>Corynebacterium</i>     | <i>durum</i> oral taxon<br>595                | S299 | Firmicutes     | Clostridia          | Clostridiales     | Lachnospiraceae_[XIVa] | <i>Johnsonella</i>   | <i>ignava</i> oral taxon<br>635                  |
| S92 | Firmicutes     | Bacilli        | Lactobacillales  | Streptococcaceae          | <i>Streptococcus</i>       | <i>sp. oral</i> taxon 061                     | S300 | Bacteroidetes  | Bacteroides         | Bacteroidales     | Prevotellaceae         | <i>Prevotella</i>    | <i>sp. oral</i> taxon 515                        |
| S93 | Firmicutes     | Bacilli        | Lactobacillales  | Aerococcaceae             | <i>Abiotrophia</i>         | <i>defectiva</i> oral<br>taxon 389            | S301 | Proteobacteria | Alphaproteobacteria | Rhodobacteriales  | Rhodobacteraceae       | <i>Rhodobacter</i>   | <i>capsulatus</i> oral<br>taxon 857              |

|      |                |                     |                     |                      |                                             |                                                    |      |                |                     |                     |                        |                            |                                                    |
|------|----------------|---------------------|---------------------|----------------------|---------------------------------------------|----------------------------------------------------|------|----------------|---------------------|---------------------|------------------------|----------------------------|----------------------------------------------------|
| S94  | Actinobacteria | Actinobacteria      | Actinomycetales     | Propionibacteriaceae | <i>Propionibacterium</i>                    | <i>propionicum</i> oral<br>taxon 739               | S302 | Proteobacteria | Betaproteobacteria  | Burkholderiales     | Burkholderiaceae       | <i>Burkholderia</i>        | <i>cepacia</i> oral<br>taxon 571                   |
| S95  | Bacteroidetes  | Flavobacteria       | Flavobacteriales    | Flavobacteriaceae    | <i>Capnocytophaga</i>                       | <i>sp. oral taxon 324</i><br><i>saccharolytica</i> | S303 | Firmicutes     | Clostridia          | Clostridiales       | Veillonellaceae        | <i>Mitsuokella</i>         | <i>sp. oral taxon 131</i><br><i>piscolens</i> oral |
| S96  | Bacteroidetes  | Bacteroides         | Bacteroidales       | Prevotellaceae       | <i>Prevotella</i>                           | <i>oral taxon 781</i>                              | S304 | Synergistetes  | Synergistetes_[C-1] | Synergistetes_[O-1] | Synergistetes_[F-1]    | <i>Pyramidobacter</i>      | <i>taxon 357</i>                                   |
| S97  | Firmicutes     | Clostridia          | Clostridiales       | Clostridiales_[F-2]  | <i>Clostridiales_[F-2]</i><br><i>][G-2]</i> | <i>sp. oral taxon 085</i>                          | S305 | Fusobacteria   | Fusobacteria        | Fusobacteriales     | Leptotrichiaceae       | <i>Leptotrichia</i>        | <i>sp. oral taxon 847</i>                          |
| S98  | Bacteroidetes  | Bacteroidetes_[C-1] | Bacteroidetes_[O-1] | Bacteroidetes_[F-1]  | <i>Bacteroidetes_[G-5]</i>                  | <i>sp. oral taxon 505</i>                          | S306 | Tenericutes    | Mollicutes          | Mycoplasmatales     | Mycoplasmataceae       | <i>Mycoplasma</i>          | <i>faucium</i> oral<br>taxon 606                   |
| S99  | Fusobacteria   | Fusobacteria        | Fusobacteriales     | Fusobacteriaceae     | <i>Fusobacterium</i>                        | <i>nucleatum</i> oral<br>taxon 698                 | S307 | Actinobacteria | Actinobacteria      | Actinomycetales     | Actinomycetaceae       | <i>Actinomyces</i>         | <i>meyeri</i> oral taxon<br>671                    |
| S100 | Bacteroidetes  | Bacteroides         | Bacteroidales       | Bacteroidales_[F-2]  | <i>Bacteroidales_[G-2]</i>                  | <i>sp. oral taxon 274</i>                          | S308 | Firmicutes     | Bacilli             | Bacillales          | Bacillaceae            | <i>Bacillus</i>            | <i>subtilis</i> oral taxon<br>468                  |
| S101 | Bacteroidetes  | Bacteroides         | Bacteroidales       | Prevotellaceae       | <i>Prevotella</i>                           | <i>multiformis</i> oral<br>taxon 685               | S309 | Proteobacteria | Betaproteobacteria  | Neisseriales        | Neisseriaceae          | <i>Neisseria</i>           | <i>flavescens</i> oral<br>taxon 610                |
| S102 | Proteobacteria | Gammaproteobacteria | Pasteurellales      | Pasteurellaceae      | <i>Aggregatibacter</i>                      | <i>sp. oral taxon 898</i>                          | S310 | Bacteroidetes  | Flavobacteria       | Flavobacteriales    | Flavobacteriaceae      | <i>Capnocytophaga</i>      | <i>sp. oral taxon 902</i>                          |
| S103 | Spirochaetes   | Spirochaetes        | Spirochaetales      | Spirochaetaceae      | <i>Treponema</i>                            | <i>sp. oral taxon 237</i>                          | S311 | Proteobacteria | Betaproteobacteria  | Neisseriales        | Neisseriaceae          | <i>Kingella</i>            | <i>oralis</i> oral taxon<br>706                    |
| S104 | Actinobacteria | Actinobacteria      | Actinomycetales     | Actinomycetaceae     | <i>Actinomyces</i>                          | <i>graevenützi</i> oral<br>taxon 866               | S312 | Actinobacteria | Actinobacteria      | Actinomycetales     | Actinomycetaceae       | <i>Actinomyces</i>         | <i>sp. oral taxon 896</i>                          |
| S105 | Bacteroidetes  | Bacteroides         | Bacteroidales       | Prevotellaceae       | <i>Prevotella</i>                           | <i>sp. oral taxon 293</i>                          | S313 | Proteobacteria | Alphaproteobacteria | Rhizobiales         | Brucellaceae           | <i>Ochrobactrum</i>        | <i>anthropi</i> oral<br>taxon 544                  |
| S106 | Bacteroidetes  | Bacteroides         | Bacteroidales       | Prevotellaceae       | <i>Prevotella</i>                           | <i>sp. oral taxon 313</i>                          | S314 | Firmicutes     | Clostridia          | Clostridiales       | Lachnospiraceae_[XIVa] | <i>Lachnoanaerobaculum</i> | <i>sp. oral taxon 089</i>                          |

|      |                |                       |                    |                         |                              |                                 |      |                |                     |                  |                         |                                     |                                   |
|------|----------------|-----------------------|--------------------|-------------------------|------------------------------|---------------------------------|------|----------------|---------------------|------------------|-------------------------|-------------------------------------|-----------------------------------|
| S107 | Actinobacteria | Actinobacteria        | Actinomycetales    | Dietziaceae             | <i>Dietzia</i>               | <i>sp. oral taxon 368</i>       | S315 | Firmicutes     | Bacilli             | Lactobacillales  | Lactobacillaceae        | <i>Lactobacillus</i>                | <i>salivarius oral taxon 756</i>  |
| S108 | Firmicutes     | Clostridia            | Clostridiales      | Lachnospiraceae_[XIVa]  | <i>Lachnospiraceae_[G-3]</i> | <i>sp. oral taxon 100</i>       | S316 | Firmicutes     | Clostridia          | Clostridiales    | Peptostreptococcae_[XI] | <i>Peptostreptococcae_[XI][G-3]</i> | <i>sp. oral taxon 382</i>         |
| S109 | Firmicutes     | Clostridia            | Clostridiales      | Veillonellaceae         | <i>Veillonellaceae_[G-1]</i> | <i>sp. oral taxon 155</i>       | S317 | Proteobacteria | Alphaproteobacteria | Sphingomonadales | Sphingomonadaceae       | <i>Sphingomonas</i>                 | <i>sp. oral taxon 007</i>         |
| S110 | Spirochaetes   | Spirochaetes          | Spirochaetales     | Spirochaetaceae         | <i>Treponema</i>             | <i>sp. oral taxon 263</i>       | S318 | Proteobacteria | Alphaproteobacteria | Rhizobiales      | Rhizobiaceae            | <i>Agrobacterium</i>                | <i>tumefaciens oral taxon 485</i> |
| S111 | Bacteroidetes  | Flavobacteria         | Flavobacteriales   | Flavobacteriaceae       | <i>Capnocytophaga</i>        | <i>sp. oral taxon 326</i>       | S319 | Firmicutes     | Bacilli             | Bacillales       | Staphylococcaceae       | <i>Staphylococcus</i>               | <i>caprae oral taxon 567</i>      |
| S112 | Bacteroidetes  | Bacteroides           | Bacteroidales      | Porphyromonadaceae      | <i>Tannerella</i>            | <i>forsythia oral taxon 613</i> | S320 | Firmicutes     | Clostridia          | Clostridiales    | Veillonellaceae         | <i>Veillonella</i>                  | <i>rogosae oral taxon 158</i>     |
| S113 | Firmicutes     | Clostridia            | Clostridiales      | Peptostreptococcae_[XI] | <i>Eubacterium_[XI][G-5]</i> | <i>saphenum oral taxon 759</i>  | S321 | Spirochaetes   | Spirochaetes        | Spirochaetales   | Spirochaetaceae         | <i>Treponema</i>                    | <i>parvum oral taxon 724</i>      |
| S114 | Bacteroidetes  | Bacteroides           | Bacteroidales      | Prevotellaceae          | <i>Prevotella</i>            | <i>dentalis oral taxon 583</i>  | S322 | Bacteroidetes  | Flavobacteria       | Flavobacteriales | Flavobacteriaceae       | <i>Capnocytophaga</i>               | <i>sp. oral taxon 336</i>         |
| S115 | Proteobacteria | Epsilonproteobacteria | Campylobacteriales | Campylobacteraceae      | <i>Campylobacter</i>         | <i>sp. oral taxon 044</i>       | S323 | Actinobacteria | Actinobacteria      | Actinomycetales  | Corynebacteriaceae      | <i>Corynebacterium</i>              | <i>diphtheriae oral taxon 591</i> |
| S116 | Bacteroidetes  | Bacteroides           | Bacteroidales      | Prevotellaceae          | <i>Prevotella</i>            | <i>veroralis oral taxon 572</i> | S324 | Fusobacteria   | Fusobacteria        | Fusobacteriales  | Leptotrichiaceae        | <i>Leptotrichia</i>                 | <i>shahii oral taxon 214</i>      |
| S117 | Spirochaetes   | Spirochaetes          | Spirochaetales     | Spirochaetaceae         | <i>Treponema</i>             | <i>sp. oral taxon 234</i>       | S325 | Actinobacteria | Actinobacteria      | Actinomycetales  | Propionibacteriaceae    | <i>Propionibacterium</i>            | <i>sp. oral taxon 915</i>         |
| S118 | Bacteroidetes  | Bacteroides           | Bacteroidales      | Prevotellaceae          | <i>Prevotella</i>            | <i>micans oral taxon 378</i>    | S326 | TM7            | TM7_[C-1]           | TM7_[O-1]        | TM7_[F-1]               | <i>TM7_[G-1]</i>                    | <i>sp. oral taxon 352</i>         |
| S119 | Bacteroidetes  | Flavobacteria         | Flavobacteriales   | Flavobacteriaceae       | <i>Bergeyella</i>            | <i>sp. oral taxon 900</i>       | S327 | Proteobacteria | Betaproteobacteria  | Burkholderiales  | Ralstoniaceae           | <i>Ralstonia</i>                    | <i>pickettii oral taxon 854</i>   |

|      |                |                     |                     |                               |                                       |                                      |      |                |                     |                     |                        |                              |                                         |
|------|----------------|---------------------|---------------------|-------------------------------|---------------------------------------|--------------------------------------|------|----------------|---------------------|---------------------|------------------------|------------------------------|-----------------------------------------|
| S120 | Firmicutes     | Clostridia          | Clostridiales       | Clostridiales_[F-1]]<br>[G-1] | <i>Clostridiales_[F-1]]<br/>[G-1]</i> | <i>sp. oral taxon 093</i>            | S328 | Firmicutes     | Bacilli             | Lactobacillales     | Streptococcaceae       | <i>Lactococcus</i>           | <i>lactis oral taxon 804</i>            |
| S121 | Firmicutes     | Clostridia          | Clostridiales       | Lachnospiraceae_[XIVa]        | <i>Shuttleworthia</i>                 | <i>satelles oral taxon 095</i>       | S329 | Synergistetes  | Synergistetes_[C-1] | Synergistetes_[O-1] | Synergistetes_[F-1]    | <i>Jonquetella</i>           | <i>anthropi oral taxon 777</i>          |
| S122 | Fusobacteria   | Fusobacteria        | Fusobacteriales     | Leptotrichiaceae              | <i>Leptotrichiaceae_[G-1]</i>         | <i>sp. oral taxon 210</i>            | S330 | Firmicutes     | Clostridia          | Clostridiales       | Lachnospiraceae_[XIVa] | <i>Lachnoanaerobaculum</i>   | <i>sp. oral taxon 496</i>               |
| S123 | Synergistetes  | Synergistetes_[C-1] | Synergistetes_[O-1] | Synergistetes_[F-2]           | <i>Fretibacterium</i>                 | <i>fastidiosum oral taxon 363</i>    | S331 | Proteobacteria | Gammaproteobacteria | Pseudomonadales     | Pseudomonadaceae       | <i>Pseudomonas</i>           | <i>pseudoalcaligenes oral taxon 740</i> |
| S124 | Bacteroidetes  | Bacteroidetes_[C-1] | Bacteroidetes_[O-1] | Bacteroidetes_[F-1]           | <i>Bacteroidetes_[G-3]</i>            | <i>sp. oral taxon 503</i>            | S332 | Actinobacteria | Actinobacteria      | Actinomycetales     | Actinomycetaceae       | <i>Actinomyces</i>           | <i>sp. oral taxon 172</i>               |
| S125 | Bacteroidetes  | Bacteroides         | Bacteroidales       | Prevotellaceae                | <i>Prevotella</i>                     | <i>shahii oral taxon 795</i>         | S333 | Fusobacteria   | Fusobacteria        | Fusobacteriales     | Fusobacteriaceae       | <i>Fusobacterium</i>         | <i>sp. oral taxon 205</i>               |
| S126 | Bacteroidetes  | Bacteroides         | Bacteroidales       | Prevotellaceae                | <i>Prevotella</i>                     | <i>histicola oral taxon 298</i>      | S334 | Firmicutes     | Clostridia          | Clostridiales       | Veillonellaceae        | <i>Selenomonas</i>           | <i>dianae oral taxon 139</i>            |
| S127 | Bacteroidetes  | Flavobacteria       | Flavobacteriales    | Flavobacteriaceae             | <i>Capnocytophaga</i>                 | <i>sp. oral taxon 901</i>            | S335 | Proteobacteria | Alphaproteobacteria | Rhizobiales         | Rhizobiaceae           | <i>Rhizobium</i>             | <i>loti oral taxon 659</i>              |
| S128 | Proteobacteria | Gammaproteobacteria | Pasteurellales      | Pasteurellaceae               | <i>Haemophilus</i>                    | <i>parainfluenzae oral taxon 718</i> | S336 | Actinobacteria | Actinobacteria      | Actinomycetales     | Actinomycetaceae       | <i>Actinomyces</i>           | <i>georgiae oral taxon 617</i>          |
| S129 | Fusobacteria   | Fusobacteria        | Fusobacteriales     | Fusobacteriaceae              | <i>Fusobacterium</i>                  | <i>sp. oral taxon 203</i>            | S337 | Firmicutes     | Bacilli             | Lactobacillales     | Streptococcaceae       | <i>Streptococcus</i>         | <i>sp. oral taxon 055</i>               |
| S130 | Proteobacteria | Gammaproteobacteria | Pasteurellales      | Pasteurellaceae               | <i>Aggregatibacter</i>                | <i>sp. oral taxon 458</i>            | S338 | Proteobacteria | Gammaproteobacteria | Pasteurellales      | Pasteurellaceae        | <i>Aggregatibacter</i>       | <i>paraphrophilus oral taxon 720</i>    |
| S131 | Bacteroidetes  | Bacteroides         | Bacteroidales       | Prevotellaceae                | <i>Prevotella</i>                     | <i>buccae oral taxon 560</i>         | S339 | Firmicutes     | Clostridia          | Clostridiales       | Lachnospiraceae_[XIVa] | <i>Lachnospiraceae_[G-5]</i> | <i>sp. oral taxon 455</i>               |
| S132 | Bacteroidetes  | Bacteroides         | Bacteroidales       | Bacteroidaceae                | <i>Bacteroidaceae_[G-1]</i>           | <i>sp. oral taxon 272</i>            | S340 | Actinobacteria | Actinobacteria      | Bifidobacteriales   | Bifidobacteriaceae     | <i>Scardovia</i>             | <i>inopinata oral taxon 642</i>         |
| S133 | Spirochaetes   | Spirochaetes        | Spirochaetales      | Spirochaetaceae               | <i>Treponema</i>                      | <i>socranskii oral</i>               | S341 | Actinobacteria | Actinobacteria      | Actinomycetales     | Actinomycetaceae       | <i>Actinomyces</i>           | <i>timonensis oral</i>                  |

|      |                |                     |                     |                             |                            |                                       |      |                |                     |                     |                        |                               |                                    |
|------|----------------|---------------------|---------------------|-----------------------------|----------------------------|---------------------------------------|------|----------------|---------------------|---------------------|------------------------|-------------------------------|------------------------------------|
|      |                |                     |                     |                             |                            | taxon 769                             |      |                |                     |                     |                        |                               | taxon 179                          |
| S134 | Spirochaetes   | Spirochaetes        | Spirochaetales      | Spirochaetaceae             | <i>Treponema</i>           | <i>sp. oral taxon 258</i>             | S342 | Actinobacteria | Actinobacteria      | Actinomycetales     | Actinomycetaceae       | <i>Actinomyces</i>            | <i>oricola oral taxon 708</i>      |
| S135 | Proteobacteria | Betaproteobacteria  | Burkholderiales     | Comamonadaceae              | <i>Ottowia</i>             | <i>sp. oral taxon 894</i>             | S343 | Proteobacteria | Gammaproteobacteria | Pseudomonadales     | Pseudomonadaceae       | <i>Pseudomonas</i>            | <i>stutzeri oral taxon 477</i>     |
| S136 | Bacteroidetes  | Bacteroides         | Bacteroidales       | Prevotellaceae              | <i>Prevotella</i>          | <i>baroniae oral taxon 553</i>        | S344 | Spirochaetes   | Spirochaetes        | Spirochaetales      | Spirochaetaceae        | <i>Treponema</i>              | <i>sp. oral taxon 227</i>          |
| S137 | Firmicutes     | Clostridia          | Clostridiales       | Peptostreptococcaeae_[XIII] | <i>Parvimonas</i>          | <i>micra oral taxon 111</i>           | S345 | Actinobacteria | Actinobacteria      | Actinomycetales     | Actinomycetaceae       | <i>Actinomyces</i>            | <i>radicidentis oral taxon 746</i> |
| S138 | Bacteroidetes  | Bacteroides         | Bacteroidales       | Bacteroidaceae              | <i>Bacteroides</i>         | <i>heparinolyticus oral taxon 630</i> | S346 | Firmicutes     | Bacilli             | Lactobacillales     | Streptococcaceae       | <i>Streptococcus</i>          | <i>mutans oral taxon 686</i>       |
| S139 | Bacteroidetes  | Flavobacteria       | Flavobacteriales    | Flavobacteriaceae           | <i>Bergeyella</i>          | <i>sp. oral taxon 907</i>             | S347 | Bacteroidetes  | Flavobacteria       | Flavobacteriales    | Flavobacteriales_[F-2] | <i>Flavobacteriales_[G-2]</i> | <i>sp. oral taxon 320</i>          |
| S140 | Spirochaetes   | Spirochaetes        | Spirochaetales      | Spirochaetaceae             | <i>Treponema</i>           | <i>sp. oral taxon 256</i>             | S348 | Proteobacteria | Gammaproteobacteria | Pasteurellales      | Pasteurellaceae        | <i>Haemophilus</i>            | <i>influenzae oral taxon 641</i>   |
| S141 | Bacteroidetes  | Bacteroidetes_[C-2] | Bacteroidetes_[O-2] | Bacteroidetes_[F-2]         | <i>Bacteroidetes_[G-6]</i> | <i>sp. oral taxon 516</i>             | S349 | Proteobacteria | Gammaproteobacteria | Pseudomonadales     | Pseudomonadaceae       | <i>Pseudomonas</i>            | <i>fluorescens oral taxon 612</i>  |
| S142 | Firmicutes     | Clostridia          | Clostridiales       | Peptostreptococcaeae_[XI]   | <i>Eubacterium_[XI]</i>    | <i>nodatum oral taxon 694</i>         | S350 | Fusobacteria   | Fusobacteria        | Fusobacteriales     | Leptotrichiaceae       | <i>Leptotrichia</i>           | <i>sp. oral taxon 909</i>          |
| S143 | Spirochaetes   | Spirochaetes        | Spirochaetales      | Spirochaetaceae             | <i>Treponema</i>           | <i>vincentii oral taxon 029</i>       | S351 | Proteobacteria | Deltaproteobacteria | Desulfovibrionales  | Desulfovibrionaceae    | <i>Desulfovibrio</i>          | <i>sp. oral taxon 040</i>          |
| S144 | Bacteroidetes  | Bacteroidetes_[C-1] | Bacteroidetes_[O-1] | Bacteroidetes_[F-1]         | <i>Bacteroidetes_[G-3]</i> | <i>sp. oral taxon 365</i>             | S352 | TM7            | TM7_[C-1]           | TM7_[O-1]           | TM7_[F-1]              | <i>TM7_[G-4]</i>              | <i>sp. oral taxon 355</i>          |
| S145 | GN02           | GN02_[C-1]          | GN02_[O-1]          | GN02_[F-1]                  | <i>GN02_[G-1]</i>          | <i>sp. oral taxon 872</i>             | S353 | Bacteroidetes  | Bacteroidetes_[C-1] | Bacteroidetes_[O-1] | Bacteroidetes_[F-1]    | <i>Bacteroidetes_[G-5]</i>    | <i>sp. oral taxon 507</i>          |
| S146 | Firmicutes     | Clostridia          | Clostridiales       | Veillonellaceae             | <i>Dialister</i>           | <i>invisus oral taxon</i>             | S354 | Bacteroidetes  | Bacteroidetes_[C-1] | Bacteroidetes_[O-1] | Bacteroidetes_[F-1]    | <i>Bacteroidetes_[G-5]</i>    | <i>sp. oral taxon 509</i>          |

|      |                |                     |                     |                           |                              |                                   |      |                |                     |                  |                             |                                         |                                     |
|------|----------------|---------------------|---------------------|---------------------------|------------------------------|-----------------------------------|------|----------------|---------------------|------------------|-----------------------------|-----------------------------------------|-------------------------------------|
|      |                |                     |                     |                           |                              | 118                               |      |                | 1]                  | 1]               | 1]                          | 4]                                      |                                     |
| S147 | Proteobacteria | Gammaproteobacteria | Pasteurellales      | Pasteurellaceae           | <i>Haemophilus</i>           | <i>sp. oral taxon 036</i>         | S355 | Proteobacteria | Betaproteobacteria  | Neisseriales     | Neisseriaceae               | <i>Neisseria</i>                        | <i>meningitidis oral taxon 669</i>  |
| S148 | Firmicutes     | Clostridia          | Clostridiales       | Peptostreptococcaeae_[XI] | <i>Mogibacterium</i>         | <i>timidum oral taxon 042</i>     | S356 | Firmicutes     | Clostridia          | Clostridiales    | Veillonellaceae             | <i>Selenomonas</i>                      | <i>flueggei oral taxon 125</i>      |
| S149 | Firmicutes     | Bacilli             | Lactobacillales     | Lactobacillaceae          | <i>Lactobacillus</i>         | <i>vaginalis oral taxon 051</i>   | S357 | Proteobacteria | Alphaproteobacteria | Rhizobiales      | Bradyrhizobiaceae           | <i>Bradyrhizobium</i>                   | <i>elkanii oral taxon 597</i>       |
| S150 | Fusobacteria   | Fusobacteria        | Fusobacteriales     | Leptotrichiaceae          | <i>Leptotrichia</i>          | <i>sp. oral taxon 498</i>         | S358 | Bacteroidetes  | Flavobacteria       | Flavobacteriales | Flavobacteriaceae           | <i>Capnocytophaga</i>                   | <i>ochracea oral taxon 700</i>      |
| S151 | Bacteroidetes  | Flavobacteria       | Flavobacteriales    | Flavobacteriaceae         | <i>Capnocytophaga</i>        | <i>sp. oral taxon 878</i>         | S359 | Proteobacteria | Gammaproteobacteria | Pseudomonadales  | Pseudomonadaceae            | <i>Pseudomonas</i>                      | <i>aeruginosa oral taxon 536</i>    |
| S152 | Firmicutes     | Clostridia          | Clostridiales       | Lachnospiraceae_[XIVa]    | <i>Catonella</i>             | <i>sp. oral taxon 451</i>         | S360 | Firmicutes     | Clostridia          | Clostridiales    | Eubacteriaceae_[XV]         | <i>Pseudoramibacter</i>                 | <i>alactolyticus oral taxon 538</i> |
| S153 | Firmicutes     | Clostridia          | Clostridiales       | Peptostreptococcaeae_[XI] | <i>Eubacterium_[XI]</i>      | <i>sulci oral taxon [G-1] 467</i> | S361 | Firmicutes     | Clostridia          | Clostridiales    | Peptostreptococcaeae_[XIII] | <i>Parvimonas</i>                       | <i>sp oral taxon 110</i>            |
| S154 | Proteobacteria | Gammaproteobacteria | Cardiobacteriales   | Cardiobacteriaceae        | <i>Cardiobacterium</i>       | <i>hominis oral taxon 633</i>     | S362 | Firmicutes     | Clostridia          | Clostridiales    | Peptostreptococcaeae_[XIII] | <i>Peptostreptococcaeae_[XIII][G-1]</i> | <i>sp. oral taxon 113</i>           |
| S155 | Firmicutes     | Clostridia          | Clostridiales       | Lachnospiraceae_[XIVa]    | <i>Lachnospiraceae_[G-8]</i> | <i>sp. oral taxon 500</i>         | S363 | Firmicutes     | Clostridia          | Clostridiales    | Veillonellaceae             | <i>Mitsuokella</i>                      | <i>multacida oral taxon 684</i>     |
| S156 | Spirochaetes   | Spirochaetes        | Spirochaetales      | Spirochaetaceae           | <i>Treponema</i>             | <i>sp. oral taxon 231</i>         | S364 | Actinobacteria | Actinobacteria      | Coriobacteriales | Coriobacteriaceae           | <i>Atopobium</i>                        | <i>sp oral taxon 810</i>            |
| S157 | TM7            | TM7_[C-1]           | TM7_[O-1]           | TM7_[F-1]                 | <i>TM7_[G-2]</i>             | <i>sp. oral taxon 350</i>         | S365 | Actinobacteria | Actinobacteria      | Actinomycetales  | Actinomycetaceae            | <i>Mobiluncus</i>                       | <i>mulieris oral taxon 830</i>      |
| S158 | Fusobacteria   | Fusobacteria        | Fusobacteriales     | Leptotrichiaceae          | <i>Leptotrichia</i>          | <i>buccalis oral taxon 563</i>    | S366 | Firmicutes     | Bacilli             | Lactobacillales  | Lactobacillaceae            | <i>Lactobacillus</i>                    | <i>plantarum oral taxon 861</i>     |
| S159 | Bacteroidetes  | Bacteroidetes_[C-1] | Bacteroidetes_[O-1] | Bacteroidetes_[F-1]       | <i>Bacteroidetes_[G-3]</i>   | <i>sp. oral taxon 280</i>         | S367 | Actinobacteria | Actinobacteria      | Coriobacteriales | Coriobacteriaceae           | <i>Atopobium</i>                        | <i>sp. oral taxon 416</i>           |



|      |                |                     |                    |                     |                       |                            |      |                |                     |                  |                   |                        |                           |
|------|----------------|---------------------|--------------------|---------------------|-----------------------|----------------------------|------|----------------|---------------------|------------------|-------------------|------------------------|---------------------------|
| S160 | Actinobacteria | Actinobacteria      | Actinomycetales    | Actinomycetaceae    | <i>Actinomyces</i>    | <i>sp. oral taxon 848</i>  | S368 | Firmicutes     | Clostridia          | Clostridiales    | Lachnospiraceae_  | <i>Eubacterium_[XI</i> | <i>saburreum oral</i>     |
|      | a              |                     |                    |                     |                       |                            |      |                |                     |                  | [XIVa]            | <i>Va][G-1]</i>        | <i>taxon 494</i>          |
| S161 | Bacteroidetes  | Flavobacteria       | Flavobacteriales   | Flavobacteriaceae   | <i>Capnocytophaga</i> | <i>gingivalis oral</i>     | S369 | Firmicutes     | Clostridia          | Clostridiales    | Veillonellaceae   | <i>Selenomonas</i>     | <i>sp. oral taxon 388</i> |
|      |                |                     |                    |                     |                       | <i>taxon 337</i>           |      |                |                     |                  |                   |                        |                           |
| S162 | Fusobacteria   | Fusobacteria        | Fusobacteriales    | Leptotrichiaceae    | <i>Leptotrichia</i>   | <i>sp. oral taxon 392</i>  | S370 | Bacteroidetes  | Flavobacteria       | Flavobacteriales | Flavobacteriaceae | <i>Bergeyella</i>      | <i>sp. oral taxon 319</i> |
| S163 | Proteobacteria | Deltaproteobacteria | Desulfovibrionales | Desulfovibrionaceae | <i>Desulfovibrio</i>  | <i>fairfieldensis oral</i> | S371 | GN02           | GN02_[C-1]          | GN02_[O-1]       | GN02_[F-1]        | <i>GN02_[G-1]</i>      | <i>sp. oral taxon 871</i> |
|      | a              |                     |                    |                     |                       | <i>taxon 605</i>           |      |                |                     |                  |                   |                        |                           |
| S164 | Firmicutes     | Clostridia          | Clostridiales      | Peptococcaceae      | <i>Peptococcus</i>    | <i>sp. oral taxon 167</i>  | S372 | Proteobacteria | Betaproteobacteria  | Neisseriales     | Neisseriaceae     | <i>Eikenella</i>       | <i>sp. oral taxon 011</i> |
|      |                |                     |                    |                     |                       |                            |      |                | a                   |                  |                   |                        |                           |
| S165 | Bacteroidetes  | Flavobacteria       | Flavobacteriales   | Flavobacteriaceae   | <i>Capnocytophaga</i> | <i>sp. oral taxon 903</i>  | S373 | Bacteroidetes  | Flavobacteria       | Flavobacteriales | Flavobacteriaceae | <i>Capnocytophaga</i>  | <i>haemolytica oral</i>   |
|      |                |                     |                    |                     |                       | <i>taxon 627</i>           |      |                |                     |                  |                   |                        | <i>curtum oral taxon</i>  |
| S166 | Bacteroidetes  | Bacteroides         | Bacteroidales      | Prevotellaceae      | <i>Prevotella</i>     | <i>sp. oral taxon 475</i>  | S374 | Actinobacteria | Actinobacteria      | Coriobacteriales | Coriobacteriaceae | <i>Cryptobacterium</i> | <i>579</i>                |
|      |                |                     |                    |                     |                       | <i>fusca oral taxon</i>    |      |                |                     |                  |                   |                        |                           |
| S167 | Bacteroidetes  | Bacteroides         | Bacteroidales      | Prevotellaceae      | <i>Prevotella</i>     | <i>782</i>                 | S375 | Proteobacteria | Betaproteobacteria  | Burkholderiales  | Ralstoniaceae     | <i>Ralstonia</i>       | <i>sp. oral taxon 027</i> |
|      |                |                     |                    |                     |                       | <i>micronuciformis</i>     |      |                | a                   |                  |                   |                        | <i>fermentum oral</i>     |
| S168 | Firmicutes     | Clostridia          | Clostridiales      | Veillonellaceae     | <i>Megasphaera</i>    | <i>oral taxon 122</i>      | S376 | Firmicutes     | Bacilli             | Lactobacillales  | Lactobacillaceae  | <i>Lactobacillus</i>   | <i>taxon 608</i>          |
|      |                |                     |                    |                     |                       | <i>dispar oral taxon</i>   |      |                |                     |                  |                   |                        | <i>exigua oral taxon</i>  |
| S169 | Firmicutes     | Clostridia          | Clostridiales      | Veillonellaceae     | <i>Veillonella</i>    | <i>160</i>                 | S377 | Actinobacteria | Actinobacteria      | Coriobacteriales | Coriobacteriaceae | <i>Slackia</i>         | <i>602</i>                |
|      |                |                     |                    |                     |                       | <i>lecithinolyticum</i>    |      |                |                     |                  |                   |                        |                           |
| S170 | Spirochaetes   | Spirochaetes        | Spirochaetales     | Spirochaetaceae     | <i>Treponema</i>      | <i>oral taxon 653</i>      | S378 | Proteobacteria | Betaproteobacteria  | Burkholderiales  | Burkholderiaceae  | <i>Ralstonia</i>       | <i>sp. oral taxon 406</i> |
|      |                |                     |                    |                     |                       |                            |      |                | a                   |                  |                   |                        |                           |
| S171 | Bacteroidetes  | Flavobacteria       | Flavobacteriales   | Flavobacteriaceae   | <i>Capnocytophaga</i> | <i>sp. oral taxon 412</i>  | S379 | Actinobacteria | Actinobacteria      | Coriobacteriales | Coriobacteriaceae | <i>Olsenella</i>       | <i>uli oral taxon 038</i> |
|      |                |                     |                    |                     |                       | <i>maltophilum oral</i>    |      |                |                     |                  |                   |                        |                           |
| S172 | Spirochaetes   | Spirochaetes        | Spirochaetales     | Spirochaetaceae     | <i>Treponema</i>      | <i>taxon 664</i>           | S380 | Spirochaetes   | Spirochaetes        | Spirochaetales   | Spirochaetaceae   | <i>Treponema</i>       | <i>sp. oral taxon 264</i> |
|      |                |                     |                    |                     |                       | <i>enoeca oral taxon</i>   |      |                |                     |                  |                   |                        |                           |
| S173 | Bacteroidetes  | Bacteroides         | Bacteroidales      | Prevotellaceae      | <i>Prevotella</i>     | <i>600</i>                 | S381 | Proteobacteria | Alphaproteobacteria | Rhizobiales      | Bradyrhizobiaceae | <i>Afipia</i>          | <i>broomeae oral</i>      |
|      |                |                     |                    |                     |                       |                            |      |                | ia                  |                  | e                 |                        | <i>taxon 559</i>          |

|      |                |                     |                     |                        |                              |                                  |      |                |                     |                   |                    |                         |                                      |
|------|----------------|---------------------|---------------------|------------------------|------------------------------|----------------------------------|------|----------------|---------------------|-------------------|--------------------|-------------------------|--------------------------------------|
| S174 | Bacteroidetes  | Bacteroides         | Bacteroidales       | Prevotellaceae         | <i>Prevotella</i>            | <i>bivia</i> oral taxon<br>556   | S382 | Firmicutes     | Bacilli             | Lactobacillales   | Streptococcaceae   | <i>Streptococcus</i>    | <i>sobrinus</i> oral<br>taxon 768    |
| S175 | Bacteroidetes  | Bacteroides         | Bacteroidales       | Prevotellaceae         | <i>Prevotella</i>            | <i>sp. oral taxon 315</i>        | S383 | Tenericutes    | Mollicutes          | Mollicutes_[O-1]  | Mollicutes_[F-1]   | <i>Mollicutes_[G-1]</i> | <i>sp. oral taxon 504</i>            |
| S176 | Proteobacteria | Deltaproteobacteria | Desulfovibrionales  | Desulfomicrobiaceae    | <i>Desulfomicrobium</i>      | <i>orale</i> oral taxon<br>703   | S384 | Proteobacteria | Gammaproteobacteria | Pseudomonadales   | Pseudomonadaceae   | <i>Pseudomonas</i>      | <i>sp. oral taxon 032</i>            |
| S177 | Fusobacteria   | Fusobacteria        | Fusobacteriales     | Leptotrichiaceae       | <i>Leptotrichia</i>          | <i>sp. oral taxon 879</i>        | S385 | Proteobacteria | Gammaproteobacteria | Enterobacteriales | Enterobacteriaceae | <i>Escherichia</i>      | <i>coli</i> oral taxon<br>574        |
| S178 | Firmicutes     | Clostridia          | Clostridiales       | Veillonellaceae        | <i>Veillonellaceae_[G-1]</i> | <i>sp. oral taxon 129</i>        | S386 | Proteobacteria | Alphaproteobacteria | Sphingomonadales  | Sphingomonadaceae  | <i>Erythromicrobium</i> | <i>ramosum</i> oral<br>taxon 747     |
| S179 | Spirochaetes   | Spirochaetes        | Spirochaetales      | Spirochaetaceae        | <i>Treponema</i>             | <i>sp. oral taxon 249</i>        | S387 | Firmicutes     | Bacilli             | Lactobacillales   | Enterococcaceae    | <i>Enterococcus</i>     | <i>durans</i> oral taxon<br>880      |
| S180 | Bacteroidetes  | Bacteroidetes_[C-1] | Bacteroidetes_[O-1] | Bacteroidetes_[F-1]    | <i>Bacteroidetes_[G-3]</i>   | <i>sp. oral taxon 436</i>        | S388 | Actinobacteria | Actinobacteria      | Coriobacteriales  | Coriobacteriaceae  | <i>Olsenella</i>        | <i>profusa</i> oral taxon<br>806     |
| S181 | Firmicutes     | Clostridia          | Clostridiales       | Lachnospiraceae_[XIVa] | <i>Lachnospiraceae_[G-2]</i> | <i>sp. oral taxon 088</i>        | S389 | Bacteroidetes  | Bacteroides         | Bacteroidales     | Porphyromonadaceae | <i>Tannerella</i>       | <i>sp. oral taxon 916</i>            |
| S182 | Firmicutes     | Bacilli             | Lactobacillales     | Streptococcaceae       | <i>Streptococcus</i>         | <i>downei</i> oral taxon<br>594  | S390 | Proteobacteria | Betaproteobacteria  | Burkholderiales   | Alcaligenaceae     | <i>Achromobacter</i>    | <i>xylooxidans</i> oral<br>taxon 343 |
| S183 | Actinobacteria | Actinobacteria      | Coriobacteriales    | Coriobacteriaceae      | <i>Atopobium</i>             | <i>rimae</i> oral taxon<br>750   | S391 | Actinobacteria | Actinobacteria      | Actinomycetales   | Corynebacteriaceae | <i>Corynebacterium</i>  | <i>mucifaciens</i> oral<br>taxon 835 |
| S184 | Bacteroidetes  | Bacteroides         | Bacteroidales       | Prevotellaceae         | <i>Prevotella</i>            | <i>marshii</i> oral<br>taxon 665 | S392 | TM7            | TM7_[C-1]           | TM7_[O-1]         | TM7_[F-2]          | <i>TM7_[G-5]</i>        | <i>sp. oral taxon 356</i>            |
| S185 | Proteobacteria | Betaproteobacteria  | Neisseriales        | Neisseriaceae          | <i>Neisseria</i>             | <i>sicca</i> oral taxon<br>764   | S393 | Firmicutes     | Bacilli             | Lactobacillales   | Lactobacillaceae   | <i>Lactobacillus</i>    | <i>paracasei</i> oral<br>taxon 716   |
| S186 | Firmicutes     | Clostridia          | Clostridiales       | Lachnospiraceae_[XIVa] | <i>Lachnoanaerobaculum</i>   | <i>orale</i> oral taxon<br>082   | S394 | Firmicutes     | Bacilli             | Lactobacillales   | Lactobacillaceae   | <i>Lactobacillus</i>    | <i>gasseri</i> oral taxon<br>615     |
| S187 | Spirochaetes   | Spirochaetes        | Spirochaetales      | Spirochaetaceae        | <i>Treponema</i>             | <i>sp. oral taxon 250</i>        | S395 | Firmicutes     | Clostridia          | Clostridiales     | Peptostreptococcae | <i>Finegoldia</i>       | <i>magna</i> oral taxon              |

|      |                |                       |                    |                           |                                       |                                |      |                |                     |                     |                           |                               |                                                                            |
|------|----------------|-----------------------|--------------------|---------------------------|---------------------------------------|--------------------------------|------|----------------|---------------------|---------------------|---------------------------|-------------------------------|----------------------------------------------------------------------------|
|      |                |                       |                    |                           |                                       |                                |      |                |                     |                     | ceae_[XIII]               | 662                           |                                                                            |
| S188 | Firmicutes     | Clostridia            | Clostridiales      | Lachnospiraceae_[XIVa]    | <i>Johnsonella</i>                    | <i>sp. oral taxon 166</i>      | S396 | Fusobacteria   | Fusobacteria        | Fusobacteriales     | Fusobacteriaceae          | <i>Fusobacterium</i>          | <i>gonidiaformans</i><br><i>oral taxon 860</i>                             |
| S189 | Firmicutes     | Clostridia            | Clostridiales      | Peptostreptococcaeae_[XI] | <i>Peptostreptococcaeae_[XI][G-4]</i> | <i>sp. oral taxon 369</i>      | S397 | TM7            | TM7_[C-1]           | TM7_[O-1]           | TM7_[F-1]                 | <i>TM7_[G-1]</i>              | <i>sp. oral taxon 349</i>                                                  |
| S190 | Bacteroidetes  | Bacteroides           | Bacteroidales      | Prevotellaceae            | <i>Alloprevotella</i>                 | <i>sp. oral taxon 474</i>      | S398 | Spirochaetes   | Spirochaetes        | Spirochaetales      | Spirochaetaceae           | <i>Treponema</i>              | <i>sp. oral taxon 518</i>                                                  |
| S191 | Firmicutes     | Clostridia            | Clostridiales      | Veillonellaceae           | <i>Selenomonas</i>                    | <i>sp. oral taxon 478</i>      | S399 | Proteobacteria | Alphaproteobacteria | Sphingomonadales    | Sphingomonadaceae         | <i>Sphingomonas</i>           | <i>sp. oral taxon 004</i>                                                  |
| S192 | Spirochaetes   | Spirochaetes          | Spirochaetales     | Spirochaetaceae           | <i>Treponema</i>                      | <i>sp. oral taxon 517</i>      | S400 | Firmicutes     | Bacilli             | Lactobacillales     | Lactobacillaceae          | <i>Lactobacillus</i>          | <i>panis oral taxon 882</i><br><i>actinomycetemcomitans oral taxon 531</i> |
| S193 | Spirochaetes   | Spirochaetes          | Spirochaetales     | Spirochaetaceae           | <i>Treponema</i>                      | <i>sp. oral taxon 265</i>      | S401 | Proteobacteria | Gammaproteobacteria | Pasteurellales      | Pasteurellaceae           | <i>Aggregatibacter</i>        | <i>mitans oral taxon 531</i>                                               |
| S194 | Bacteroidetes  | Flavobacteria         | Flavobacteriales   | Flavobacteriaceae         | <i>Capnocytophaga</i>                 | <i>sp. oral taxon 863</i>      | S402 | Proteobacteria | Gammaproteobacteria | Enterobacteriales   | Enterobacteriaceae        | <i>Klebsiella</i>             | <i>pneumoniae oral taxon 731</i>                                           |
| S195 | Proteobacteria | Epsilonproteobacteria | Campylobacteriales | Campylobacteraceae        | <i>Campylobacter</i>                  | <i>gracilis oral taxon 623</i> | S403 | Firmicutes     | Clostridia          | Clostridiales       | Peptostreptococcaeae_[XI] | <i>Eubacterium_[XI][G-1]</i>  | <i>infirmum oral taxon 105</i>                                             |
| S196 | Bacteroidetes  | Bacteroides           | Bacteroidales      | Prevotellaceae            | <i>Prevotella</i>                     | <i>sp. oral taxon 301</i>      | S404 | Bacteroidetes  | Bacteroidetes_[C-1] | Bacteroidetes_[O-1] | Bacteroidetes_[F-1]       | <i>Bacteroidetes_[G-3]</i>    | <i>sp. oral taxon 899</i>                                                  |
| S197 | Spirochaetes   | Spirochaetes          | Spirochaetales     | Spirochaetaceae           | <i>Treponema</i>                      | <i>sp. oral taxon 246</i>      | S405 | Bacteroidetes  | Flavobacteria       | Flavobacteriales    | Flavobacteriales_[F-1]    | <i>Flavobacteriales_[G-1]</i> | <i>sp. oral taxon 321</i>                                                  |
| S198 | Firmicutes     | Clostridia            | Clostridiales      | Peptostreptococcaeae_[XI] | <i>Peptostreptococcaeae_[XI][G-5]</i> | <i>sp. oral taxon 493</i>      | S406 | Actinobacteria | Actinobacteria      | Actinomycetales     | Actinomycetaceae          | <i>Arcanobacterium</i>        | <i>haemolyticum oral taxon 811</i>                                         |
| S199 | Proteobacteria | Betaproteobacteria    | Neisseriales       | Neisseriaceae             | <i>Neisseria</i>                      | <i>sp. oral taxon 016</i>      | S407 | Spirochaetes   | Spirochaetes        | Spirochaetales      | Spirochaetaceae           | <i>Treponema</i>              | <i>pectinovorum oral taxon 725</i>                                         |
| S200 | Spirochaetes   | Spirochaetes          | Spirochaetales     | Spirochaetaceae           | <i>Treponema</i>                      | <i>sp. oral taxon 226</i>      | S408 | Actinobacteria | Actinobacteria      | Bifidobacteriales   | Bifidobacteriaceae        | <i>Bifidobacterium</i>        | <i>dentium oral</i>                                                        |



## Reference

1. **Zhou JY, Jiang N, Wang SG, Hu XP, Jiao KL, He XY, Li ZQ, Wang JZ.** 2016. Exploration of Human Salivary Microbiomes-Insights into the Novel Characteristics of Microbial Community Structure in Caries and Caries-Free Subjects. *Plos One* **11**.
2. **Holgerson PL, Ouml;hman C, Ronnlund A, Johansson I.** 2015. Maturation of Oral Microbiota in Children with or without Dental Caries. *Plos One* **10**.
3. **Chen L, Qin B, Du M, Zhong H, Xu Q, Li Y, Zhang P, Fan M.** 2015. Extensive description and comparison of human supra-gingival microbiome in root caries and health. *PLoS One* **10**:e0117064.
4. **Xu H, Hao WJ, Zhou Q, Wang WH, Xia ZK, Liu C, Chen XC, Qin M, Chen F.** 2014. Plaque Bacterial Microbiome Diversity in Children Younger than 30 Months with or without Caries Prior to Eruption of Second Primary Molars. *Plos One* **9**.
5. **Jiang W, Ling ZX, Lin XL, Chen YD, Zhang J, Yu JJ, Xiang C, Chen H.** 2014. Pyrosequencing Analysis of Oral Microbiota Shifting in Various Caries States in Childhood. *Microbial Ecology* **67**:962-969.
6. **Belstrom D, Fiehn NE, Nielsen CH, Holmstrup P, Kirkby N, Klepac-Ceraj V, Paster BJ, Twetman S.** 2014. Altered Bacterial Profiles in Saliva from Adults with Caries Lesions: A Case-Cohort Study. *Caries Research* **48**:368-375.
7. **Tao Y, Zhou Y, Ouyang Y, Lin H.** 2013. Dynamics of oral microbial community profiling during severe early childhood caries development monitored by PCR-DGGE. *Arch Oral Biol* **58**:1129-1138.
8. **Luo AH, Yang DQ, Xin BC, Paster BJ, Qin J.** 2012. Microbial profiles in saliva from children with and without caries in mixed dentition. *Oral Diseases* **18**:595-601.
9. **Yang F, Zeng XW, Ning K, Liu KL, Lo CC, Wang W, Chen J, Wang DM, Huang RR, Chang XZ, Chain PS, Xie G, Ling JQ, JianXu.** 2012. Saliva microbiomes distinguish caries-active from healthy human populations. *Isme Journal* **6**:1-10.
10. **Tanner ACR, Mathney JM, Kent RL, Chalmers NI, Hughes CV, Loo CY, Pradhan N, Kanasi E, Hwang J, Dahlan MA, Papadopolou E, Dewhirst FE.** 2011. Cultivable Anaerobic Microbiota of Severe Early Childhood Caries. *Journal of Clinical Microbiology* **49**:1464-1474.
11. **Gross EL, Leys EJ, Gasparovich SR, Firestone ND, Schwartzbaum JA, Janies DA, Asnani K, Griffen AL.** 2010. Bacterial 16S sequence analysis of severe caries in young permanent teeth. *J Clin Microbiol* **48**:4121-4128.
12. **Kanasi E, Dewhirst FE, Chalmers NI, Kent R, Moore A, Hughes CV, Pradhan N, Loo CY, Tanner ACR.** 2010. Clonal Analysis of the Microbiota of Severe Early Childhood Caries. *Caries Research* **44**:485-497.
13. **Ling ZX, Kong JM, Jia P, Wei CC, Wang YZ, Pan ZW, Huang WJ, Li LJ, Chen H, Xiang C.** 2010. Analysis of Oral Microbiota in Children with Dental Caries by PCR-DGGE and Barcoded Pyrosequencing. *Microbial Ecology* **60**:677-690.
14. **Li Y, Ge Y, Saxena D, Caufield PW.** 2007. Genetic profiling of the oral microbiota associated with severe early-childhood caries. *J Clin Microbiol* **45**:81-87.

15. **Li Y, Ku CYS, Xu J, Saxena D, Caufield PW.** 2005. Survey of oral microbial diversity using PCR-based denaturing gradient gel electrophoresis. *Journal of Dental Research* **84**:559-564.
